# Supplementary material for: Isolation and Structural Characterization of Eightfold Protonated Octacyanometalates [M(CNH)8]4+ (M=MoIV, WIV) from Superacids
Source: PubMed Central journal article supplement (PMC7317926; doi:10.1002/anie.202002366), 2020-04-14
Supplement: ANIE-59-10519-s001.pdf [file ANIE-59-10519-s001.pdf]

Supporting Information

**Isolation and Structural Characterization of Eightfold Protonated Octacyanometalates  $[M(CNH)_8]^{4+}$  ( $M = Mo^{IV}, W^{IV}$ ) from Superacids**

*Malte Sellin, Valérie Marvaud, and Moritz Malischewski\**

anie\_202002366\_sm\_miscellaneous\_information.pdf

## Content

|                                        |    |
|----------------------------------------|----|
| 1. Experimental Details .....          | 1  |
| 2. IR and Raman-Spectra .....          | 3  |
| 3. NMR-spectra.....                    | 7  |
| 3.1 NMR-spectra of the educts .....    | 7  |
| 3.2 NMR-spectra of the products.....   | 9  |
| 4. Crystal Structures .....            | 11 |
| 5. Continuous Shape-Measurements ..... | 19 |
| 6. DFT-Calculations .....              | 24 |
| 7. References.....                     | 32 |

### 1. Experimental Details

The reactions were performed in PFA (tetrafluoroethene-perfluoroalkoxyvinyl-copolymer) tubes with the help of a stainless steel vacuum line. Instead of stirring the mixtures were agitated with the help of the Mini-Vortex Mixer PV-1. SbF<sub>5</sub> and HF are highly dangerous compounds with devastating effects on human tissue. They should only be handled in appropriate equipment by trained personnel. Anhydrous HF and SO<sub>2</sub> were stored in stainless steel cylinders. HF was distilled from K<sub>2</sub>NiF<sub>6</sub> before use while SO<sub>2</sub> was stored over CaH<sub>2</sub>. Deuterium Fluoride DF was purchased from ABCR.

K<sub>4</sub>[Mo(CN)<sub>8</sub>] • 2H<sub>2</sub>O<sup>[1]</sup> and K<sub>4</sub>[W(CN)<sub>8</sub>] • 2H<sub>2</sub>O<sup>[2]</sup> were prepared by literature procedures.

IR Spectra were recorded on a Bruker ALPHA FTIR spectrometer inside a glovebox equipped with a diamond ATR attachment. Raman Spectra were measured with a Bruker RamanScope III. NMR Spectra of the superacidic solutions were measured in sealed 5mm PFA tubes inside 6mm NMR glass tubes containing d<sup>6</sup>-acetone on a JEOL 400 MHz ECZ spectrometer. Single-crystals were decanted off the cold HF/SO<sub>2</sub>/SbF<sub>5</sub> solution (Danger!) and manipulated in a cold nitrogen stream.

Preparation of [W(CNH)<sub>8</sub>]<sup>4+</sup> [SbF<sub>6</sub>]<sup>-4</sup> • 2HF:

Inside a glovebox, antimony pentafluoride (200 mg, 0.922 mmol) was filled into a 8 mm PFA tube equipped with a stainless steel valve. Anhydrous HF (0.8 mL) was condensed in at -196°C. Subsequently, potassium octacyanotungstate(IV) dihydrate (30 mg, 0.055 mmol) was added to the frozen solution. The mixture was brought to room temperature, resulting in a yellow solution with a yellow precipitate at room temperature. To increase the solubility sulfur dioxide (0.2 mL) was condensed into the mixture. This resulted in a clear yellow solution at room temperature. The mixture was slowly cooled to -78°C in a freezer. The next day, moisture-sensitive yellow crystals of [W(CNH)<sub>8</sub>]<sup>4+</sup> [SbF<sub>6</sub>]<sup>-4</sup> • 2HF had formed in the almost colourless solution besides colorless crystals of KSbF<sub>6</sub> and H<sub>3</sub>OSbF<sub>6</sub>.

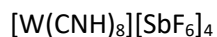

$^1\text{H}$  NMR (400.5 MHz, HF/SO<sub>2</sub>, ext.[d<sup>6</sup>]acetone, -40 °C): no signal observed (fast exchange with solvent)

$^{13}\text{C}\{^1\text{H}\}$  NMR (100.7 MHz, HF/SO<sub>2</sub>, ext.[d<sup>6</sup>]acetone, -40 °C): +115.4 ppm

$^{14}\text{N}$  NMR (28.9 MHz, HF/SO<sub>2</sub>, ext.[d<sup>6</sup>]acetone, -40 °C): -178.6 ppm (broad)

$^{19}\text{F}$  NMR (369.7 MHz, HF/SO<sub>2</sub>, ext.[d<sup>6</sup>]acetone, -40 °C): -120 ppm (very broad)

$\tilde{\nu}$  (IR, ATR powder) = 3030 b, 2145 m, 1620 m, 773 m, 661 sh, 634 vs, 569 s, 473 m cm<sup>-1</sup>

$\tilde{\nu}$  (raman, crystal) = 2183 vs, 2176 s, 666 s, 639 m, 580 w, 547 w, 463 w, 280 m, 162 m cm<sup>-1</sup>

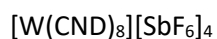

$\tilde{\nu}$  (IR, ATR powder) = 2525 b, 2161 w, 1970 b, 1180 m, 677 sh, 652 vs, 485 s cm<sup>-1</sup>

The reaction was performed accordingly, but DF instead of HF was used.

Preparation of  $[\text{Mo}(\text{CNH})_8]^{4+} [\text{SbF}_6]_4 \cdot 2\text{HF}$ :

The same procedure was performed with potassium octacyanomolybdate(IV) dihydrate (24 mg, 0.052 mmol).

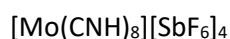

$^1\text{H}$  NMR (400.5 MHz, HF/SO<sub>2</sub>, ext.[d<sup>6</sup>]acetone, -40 °C): no signal observed (fast exchange with solvent)

$^{13}\text{C}\{^1\text{H}\}$  NMR (100.7 MHz, HF/SO<sub>2</sub>, ext.[d<sup>6</sup>]acetone, -40 °C): +121.1 ppm

$^{14}\text{N}$  NMR (28.9 MHz, HF/SO<sub>2</sub>, ext.[d<sup>6</sup>]acetone, -40 °C): -181.8 ppm (broad)

$^{19}\text{F}$  NMR (369.7 MHz, HF/SO<sub>2</sub>, ext.[d<sup>6</sup>]acetone, -40 °C): -120 ppm (very broad)

$\tilde{\nu}$  (IR, ATR powder) = 3082 b, 2166 m, 1615 m, 677 sh, 655 vs, 591 s, 487 s cm<sup>-1</sup>

$\tilde{\nu}$  (raman, crystal) = 2191 s, 2174 vs, 666 sh, 650 s, 575 w, 543 w, 457 w, 286 m, 168 sh, 153 s cm<sup>-1</sup>

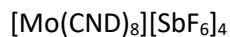

The reaction was performed accordingly, but DF instead of HF was used.

$\tilde{\nu}$  (IR, ATR powder) = 2529 b, 2166 w, 1960 b, 1182 m, 679 sh, 655 vs, 485 s cm<sup>-1</sup>

## 2. IR and Raman-Spectra

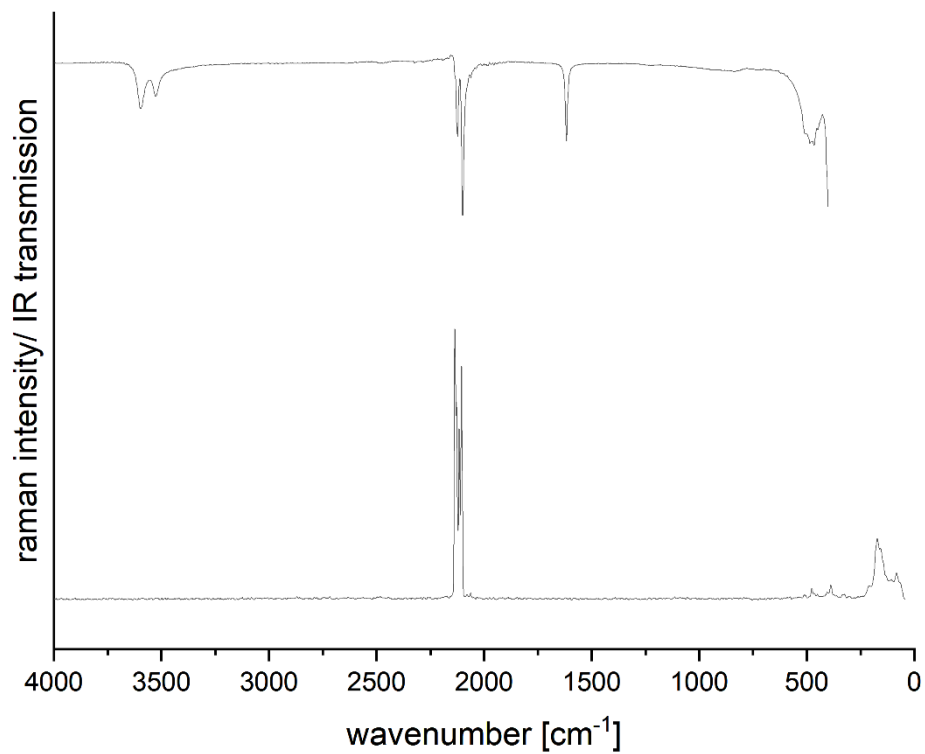

Figure S1. IR/raman spectrum of  $K_4[Mo(CN)_8] \cdot 2H_2O$  at room temperature.

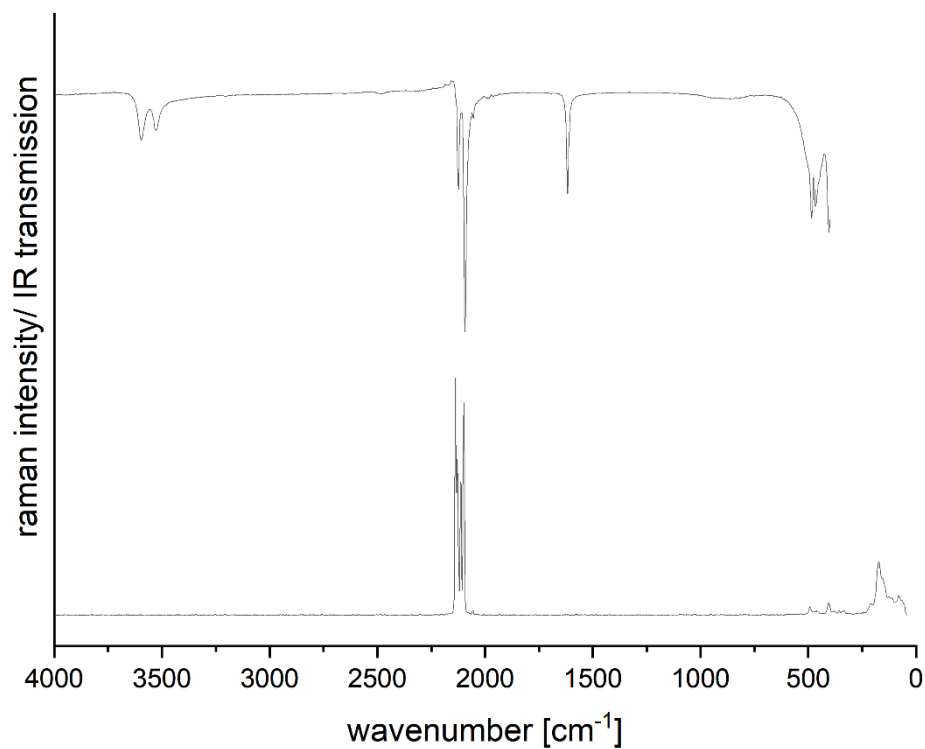

Figure S2. IR/raman spectrum of  $K_4[W(CN)_8] \cdot 2H_2O$  at room temperature.

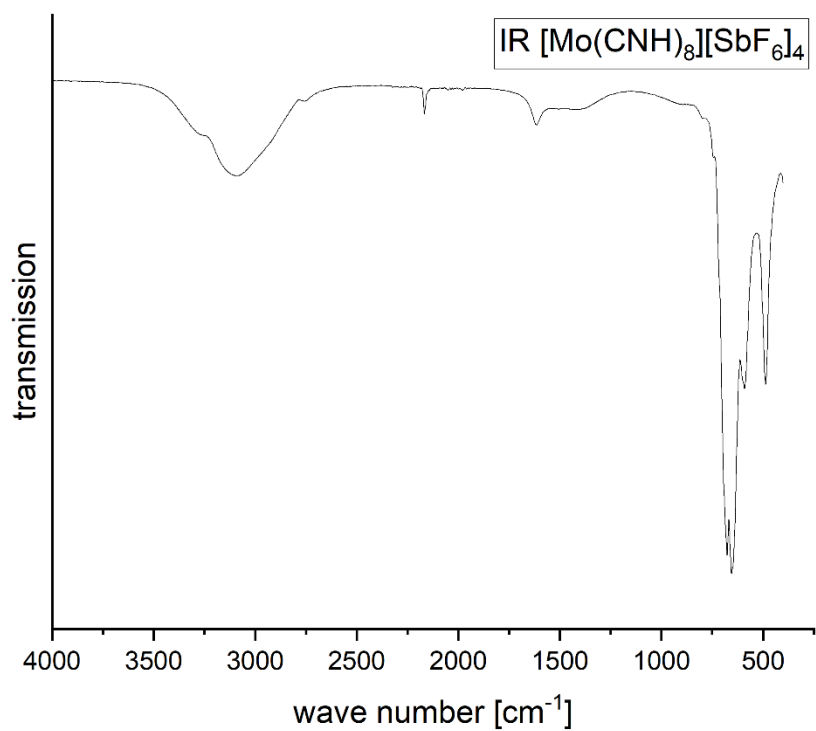

Figure S3. IR spectrum of [Mo(CNH)<sub>8</sub>][SbF<sub>6</sub>]<sub>4</sub>

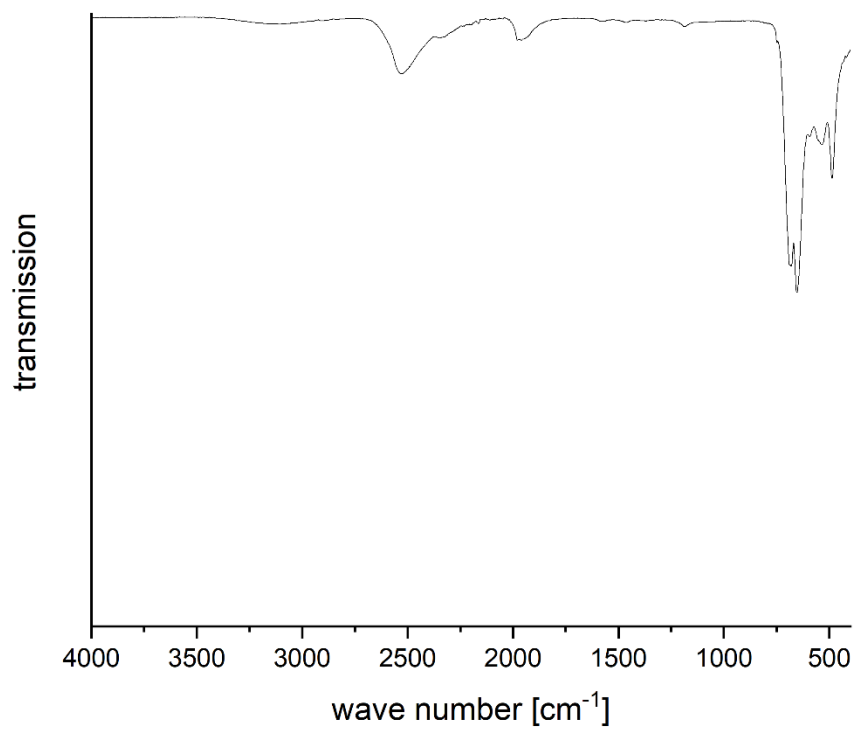

Figure S3. IR spectrum of [Mo(CND)<sub>8</sub>][SbF<sub>6</sub>]<sub>4</sub>

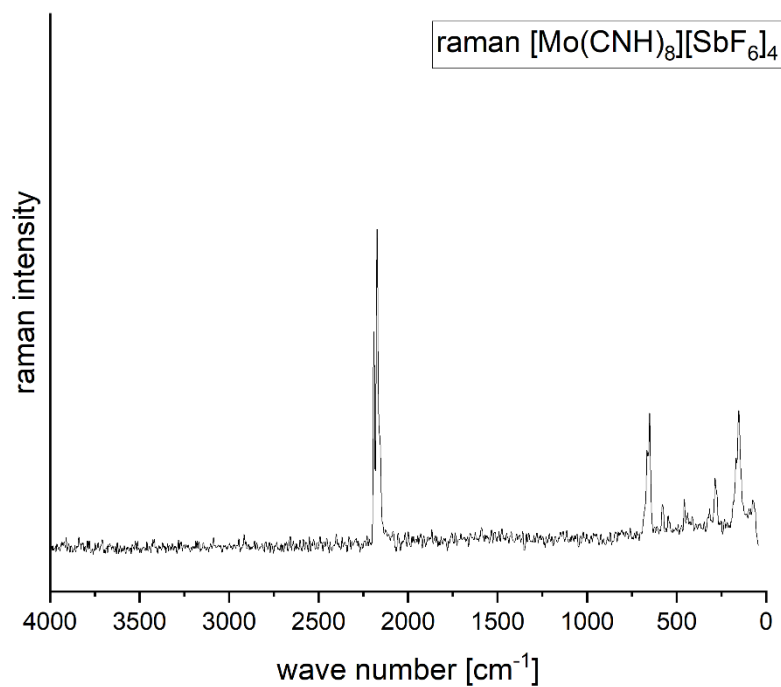

Figure S5. Raman spectrum of  $[\text{Mo}(\text{CNH})_8][\text{SbF}_6]_4$

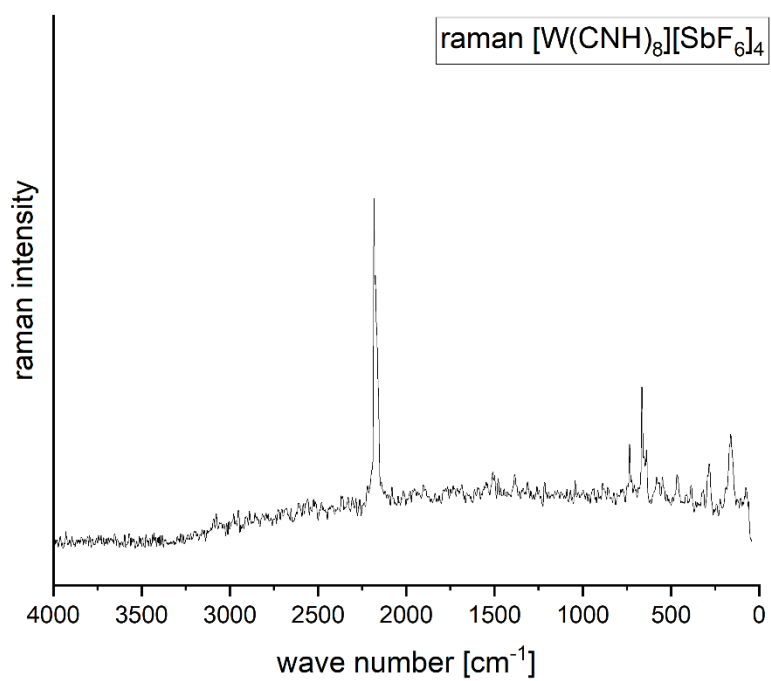

Figure S6. Raman spectrum of  $[\text{W}(\text{CNH})_8][\text{SbF}_6]_4$

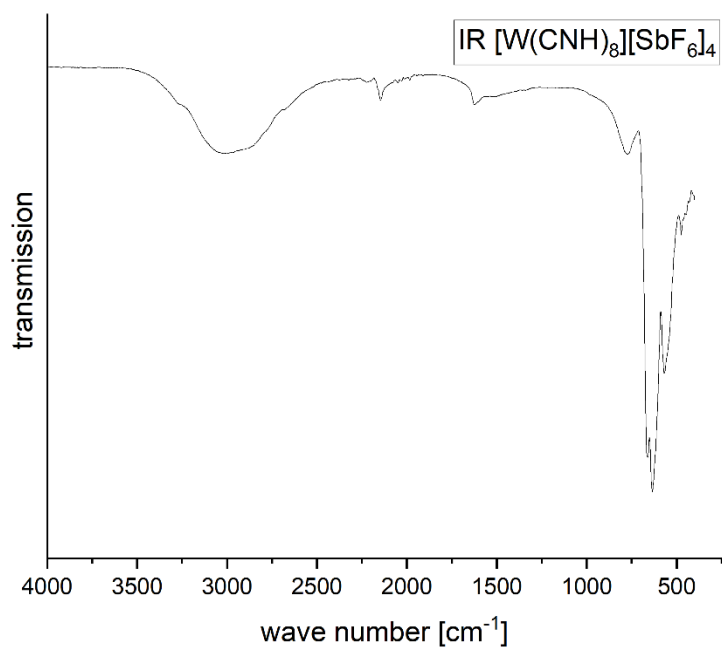

Figure S6. IR Spectrum of [W(CNH)<sub>8</sub>][SbF<sub>6</sub>]<sub>4</sub>

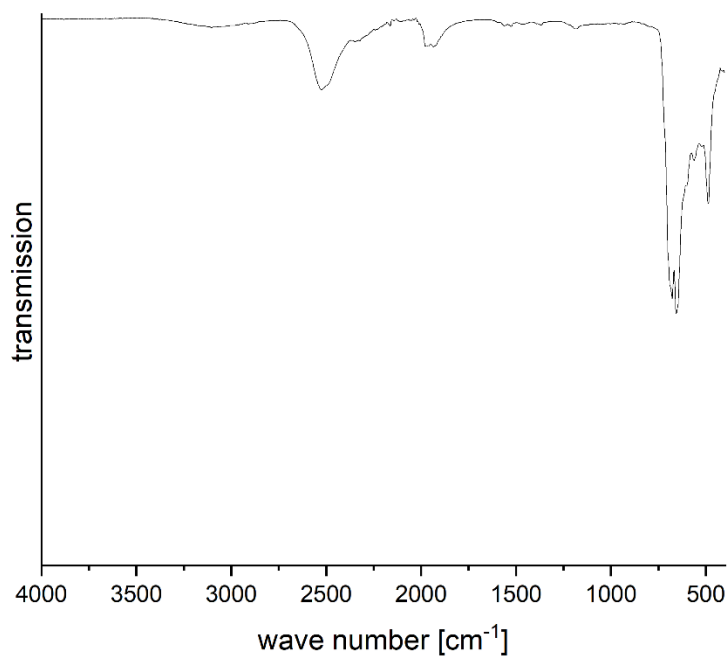

Figure S7. IR Spectrum of [W(CND)<sub>8</sub>][SbF<sub>6</sub>]<sub>4</sub>

### 3. NMR-spectra

#### 3.1 NMR-spectra of the educts

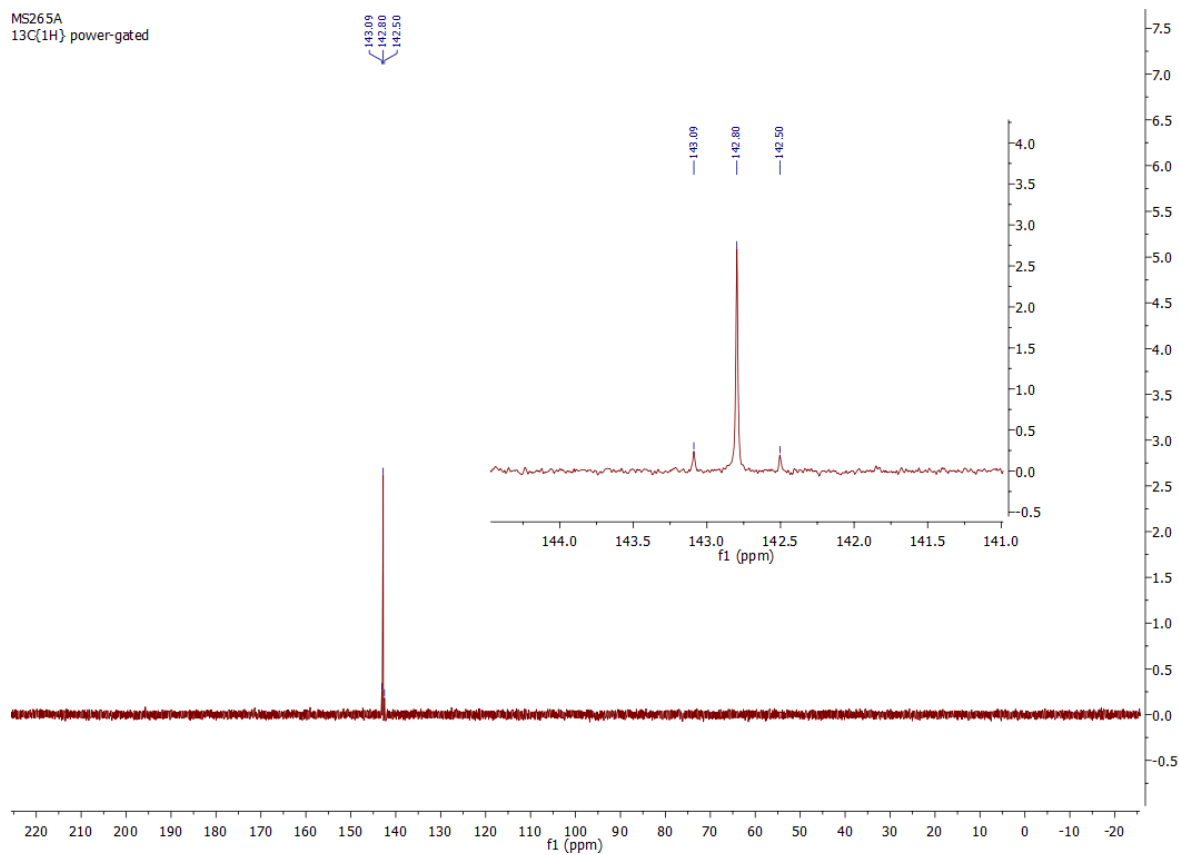

Figure S8.  $^{13}\text{C}$  NMR Spectrum of  $\text{K}_4\text{W}(\text{CN})_8$  in  $\text{D}_2\text{O}$  at room temperature



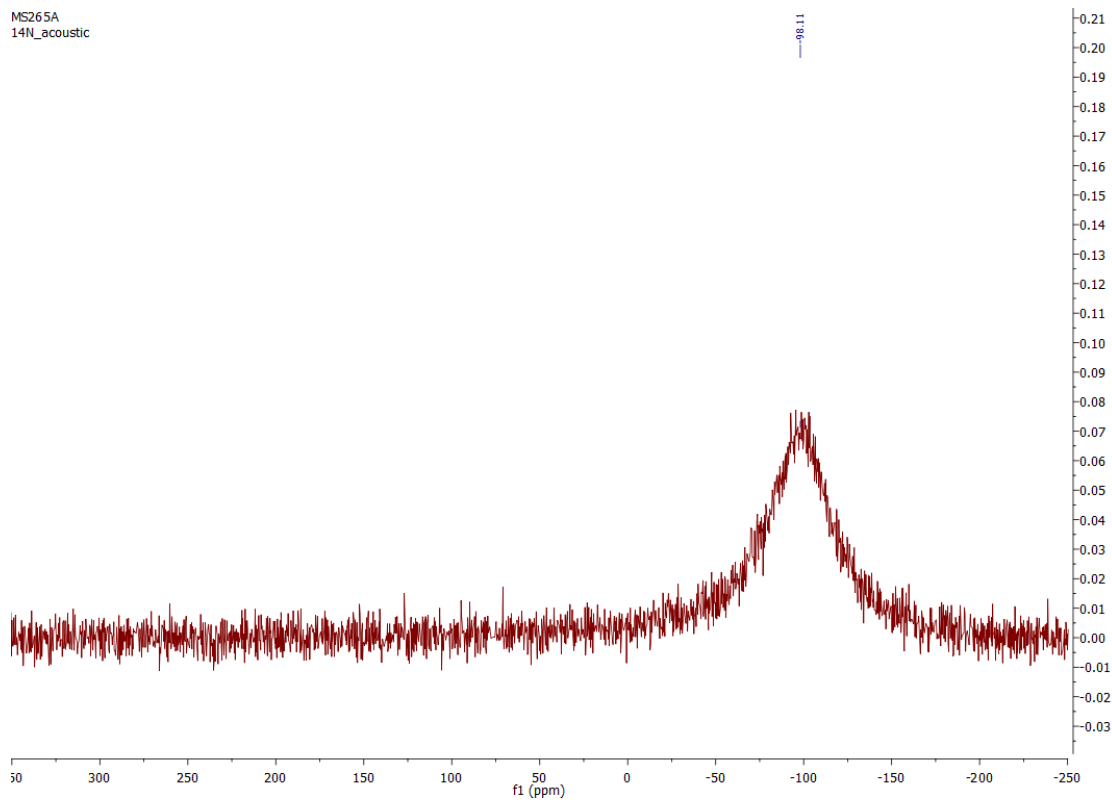

Figure S9.  $^{14}\text{N}$  NMR spectrum of  $\text{K}_4\text{W}(\text{CN})_8$  in  $\text{D}_2\text{O}$  at room temperature

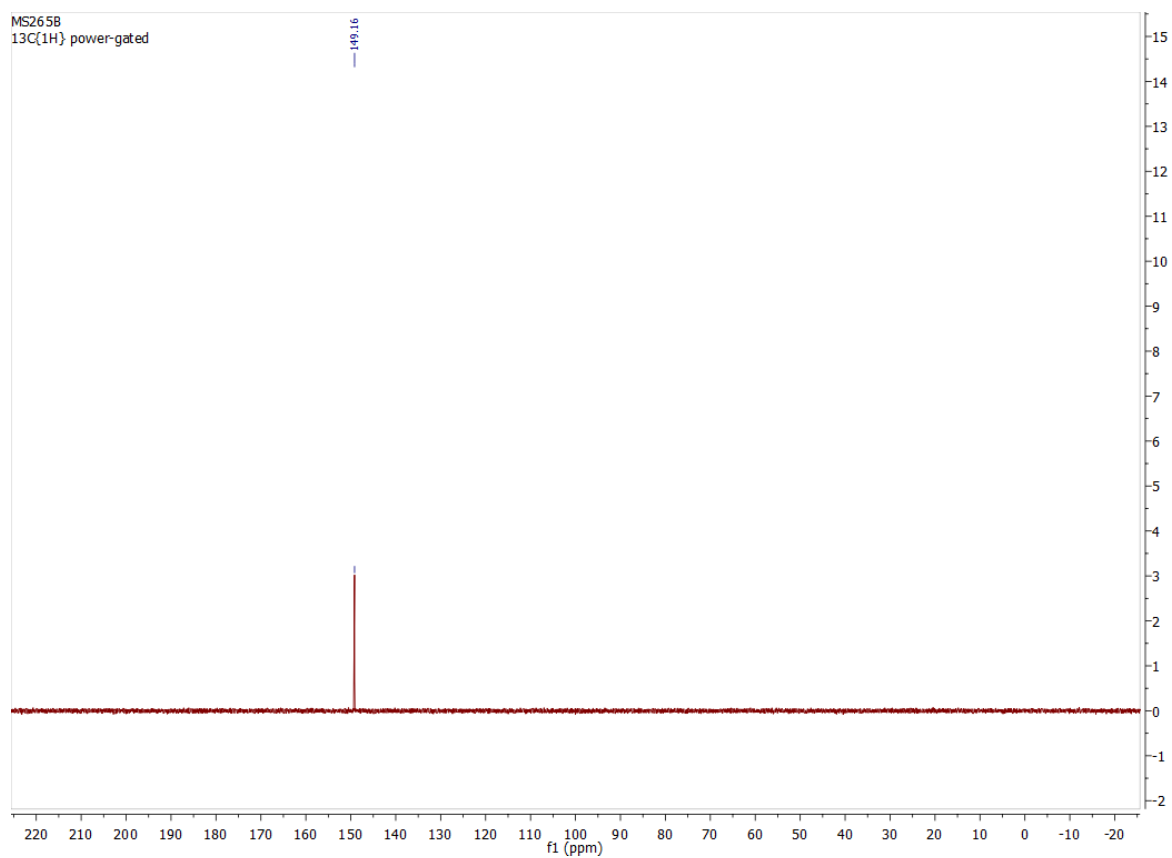

Figure S10.  $^{13}\text{C}$  NMR Spectrum of  $\text{K}_4\text{Mo}(\text{CN})_8$  in  $\text{D}_2\text{O}$  at room temperature

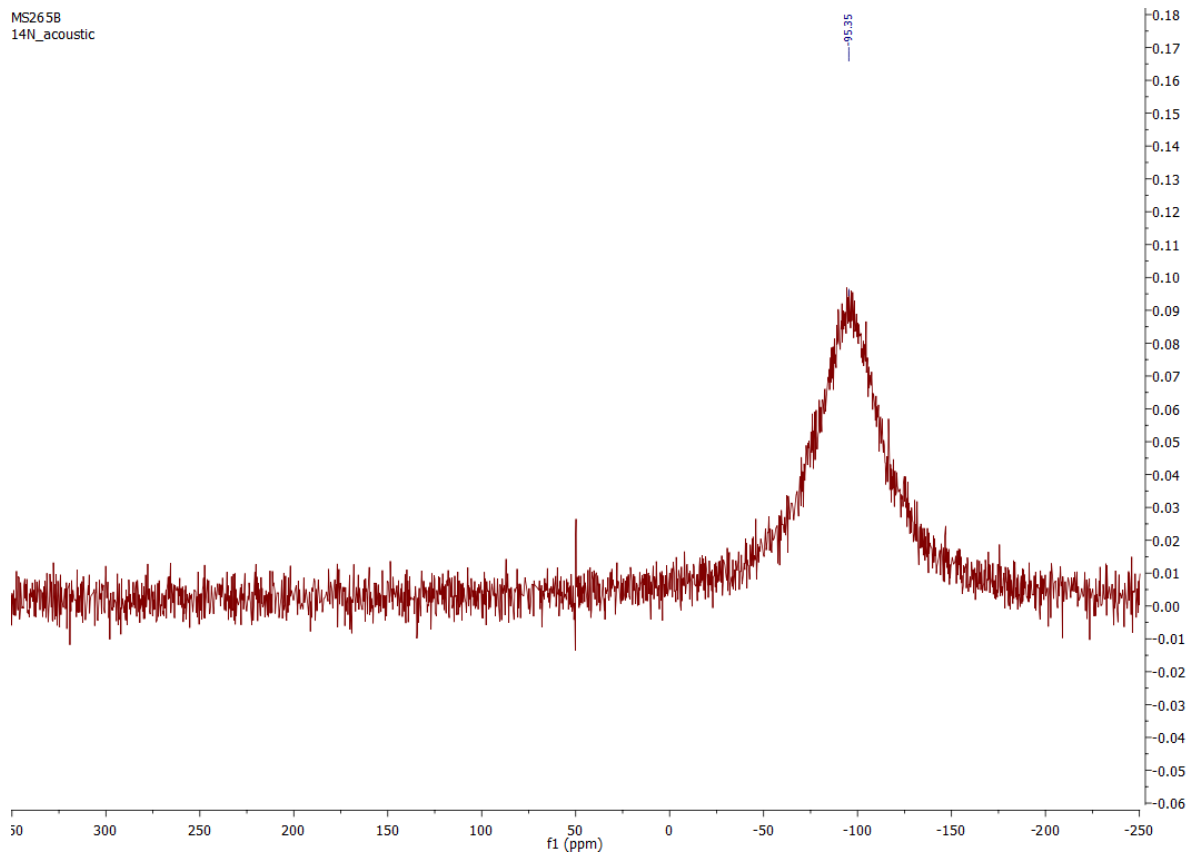

Figure S11.  $^{14}\text{N}$  NMR Spectrum of  $\text{K}_4\text{Mo}(\text{CN})_8$  in  $\text{D}_2\text{O}$  at room temperature

### 3.2 NMR-spectra of the products

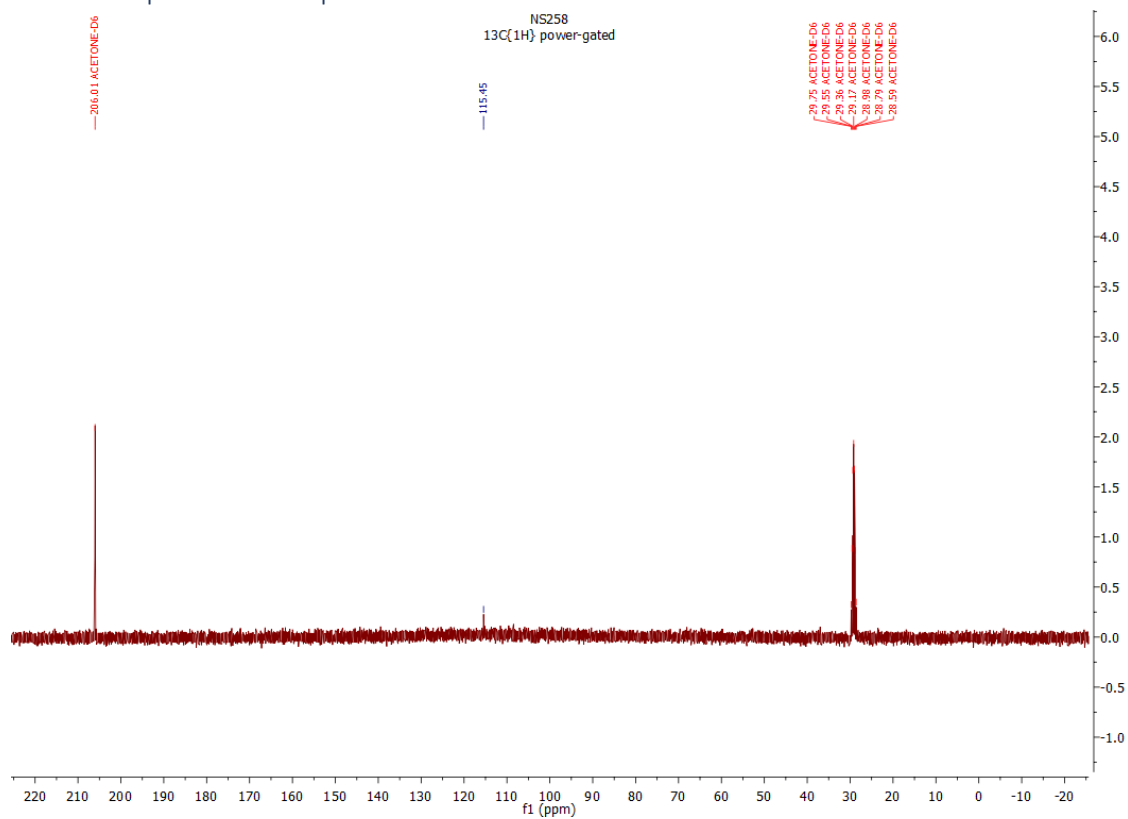

Figure S12.  $^{13}\text{C}$  NMR Spectrum of  $[\text{W}(\text{CNH})_8]^{4+} [\text{SbF}_6]^{-}_4$  in HF – ext. reference  $\text{d}^6$ -acetone

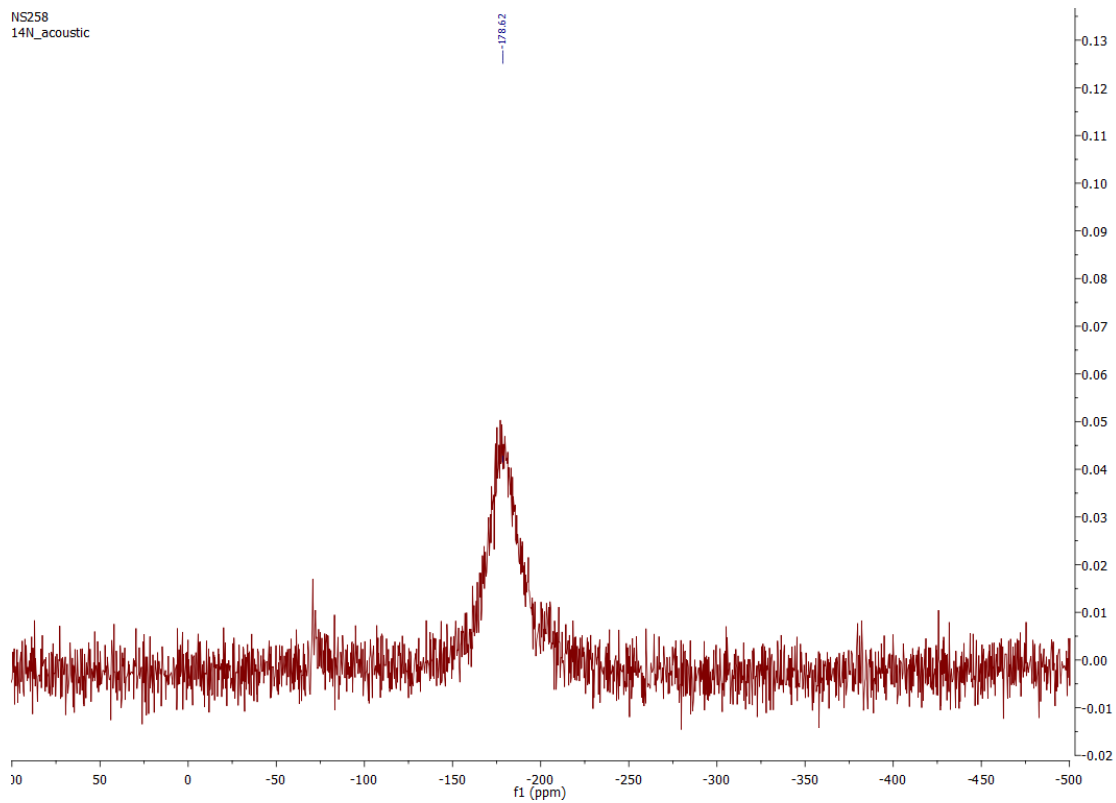

Figure S12.  $^{14}\text{N}$  NMR Spectrum of  $[\text{W}(\text{CNH})_8]^{4+} [\text{SbF}_6]_4^-$  in HF – ext. reference  $\text{d}^6$ -acetone

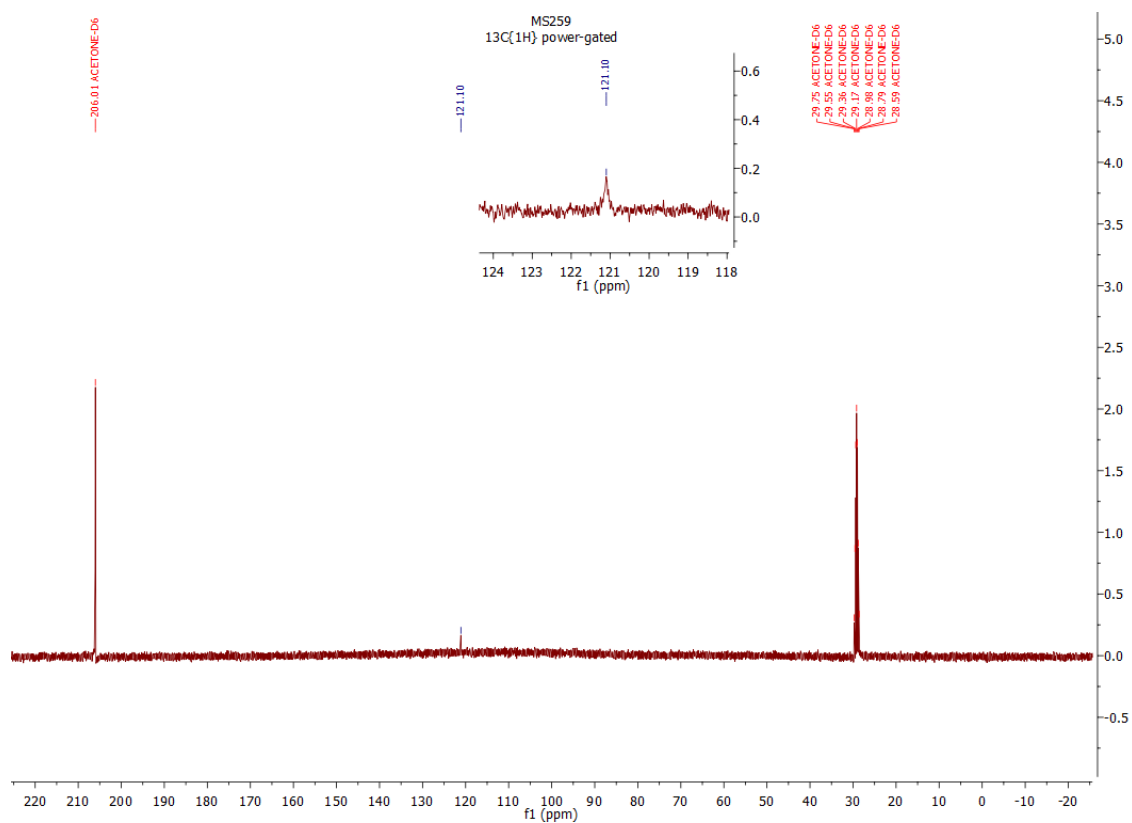

Figure S13.  $^{13}\text{C}$  NMR of  $[\text{Mo}(\text{CNH})_8]^{4+} [\text{SbF}_6]_4^-$  in HF– ext. reference  $\text{d}^6$ -acetone

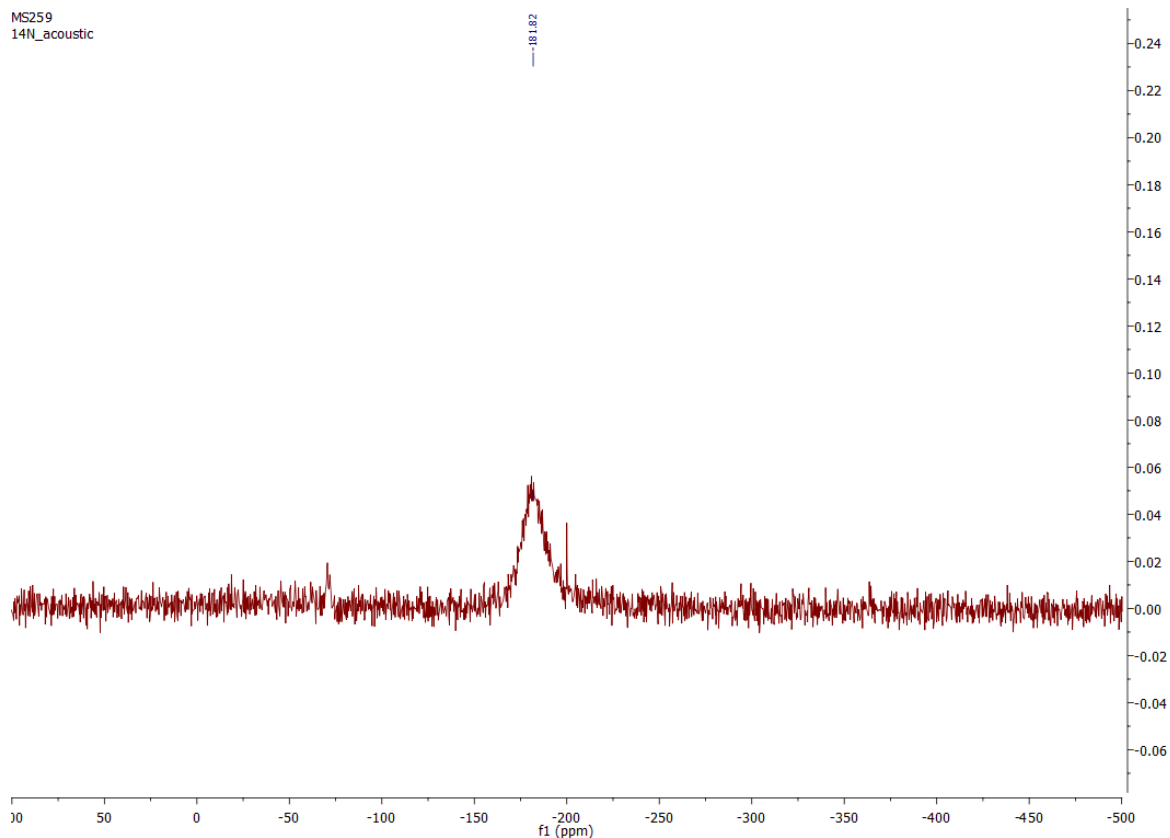

Figure S14.  $^{14}\text{N}$  NMR of  $[\text{Mo}(\text{CNH})_8]^{4+} [\text{SbF}_6]_4^-$  in HF— ext. reference  $\text{d}^6$ -acetone

#### 4. Crystal Structures

Single crystals were mounted in a cold nitrogen stream on a Bruker D8 Venture diffractometer using Mo  $\text{K}\alpha$ -radiation. X-ray structures were solved and refined using SHELXL<sup>[3]</sup>, software from Bruker<sup>[4]</sup> and OLEX.<sup>[5]</sup> Drawings and tables were generated with Mercury<sup>[6]</sup> and publCIF.<sup>[7]</sup>

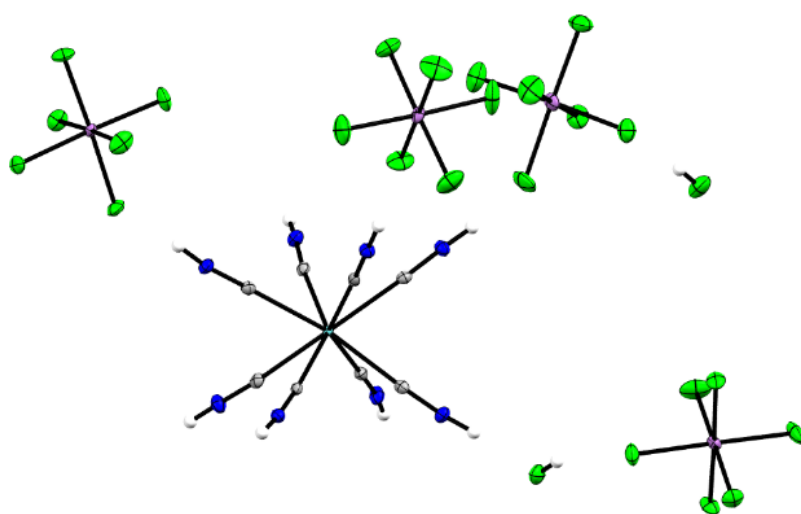

Figure S15. One formula unit in the crystal structure of  $[\text{Mo}(\text{CNH})_8]^{4+} [\text{SbF}_6]_4^- \cdot 2\text{HF}$ , ellipsoids shown at 50% probability, C grey, N blue, H white, Mo turquoise, F green, Sb lavender

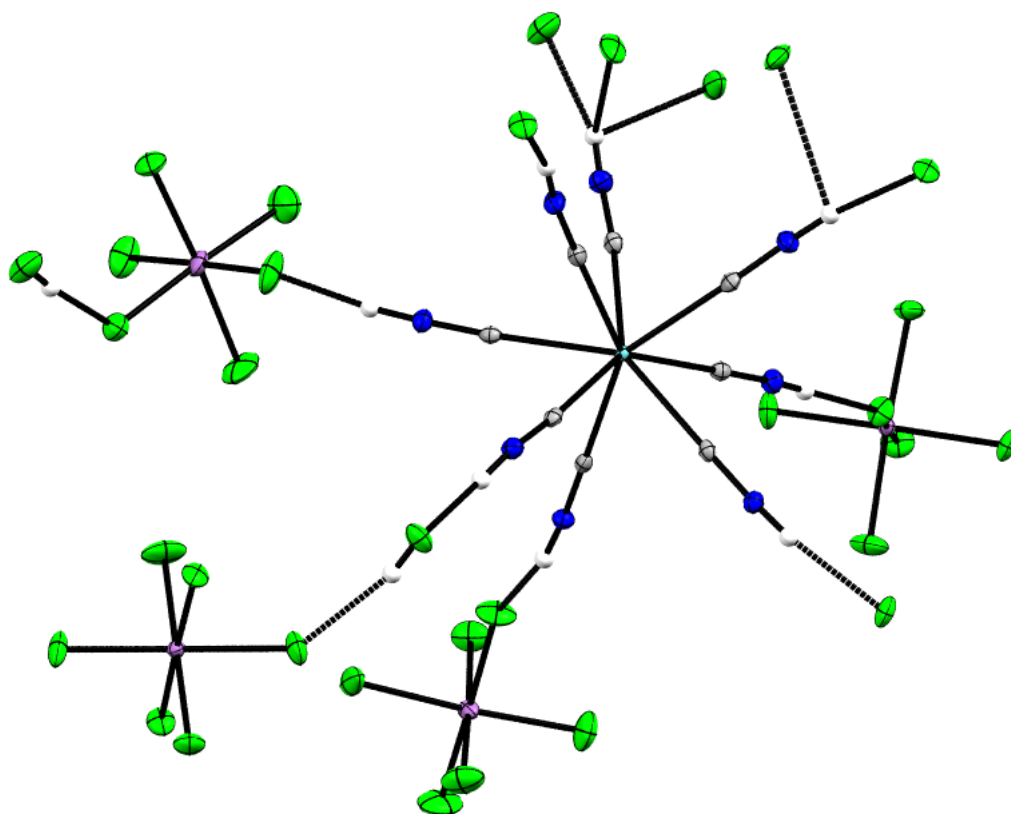

Figure S16. Network of H---F contacts in the crystal structure of  $[\text{Mo}(\text{CNH})_8]^{4+} [\text{SbF}_6]^{-}_4 \cdot 2\text{HF}$

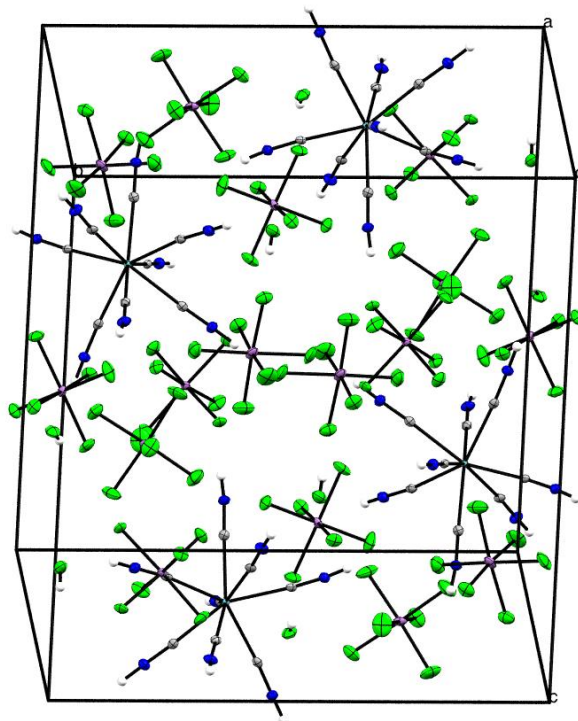

Figure S17. Unit cell of  $[\text{Mo}(\text{CNH})_8]^{4+} [\text{SbF}_6]^{-}_4 \cdot 2\text{HF}$

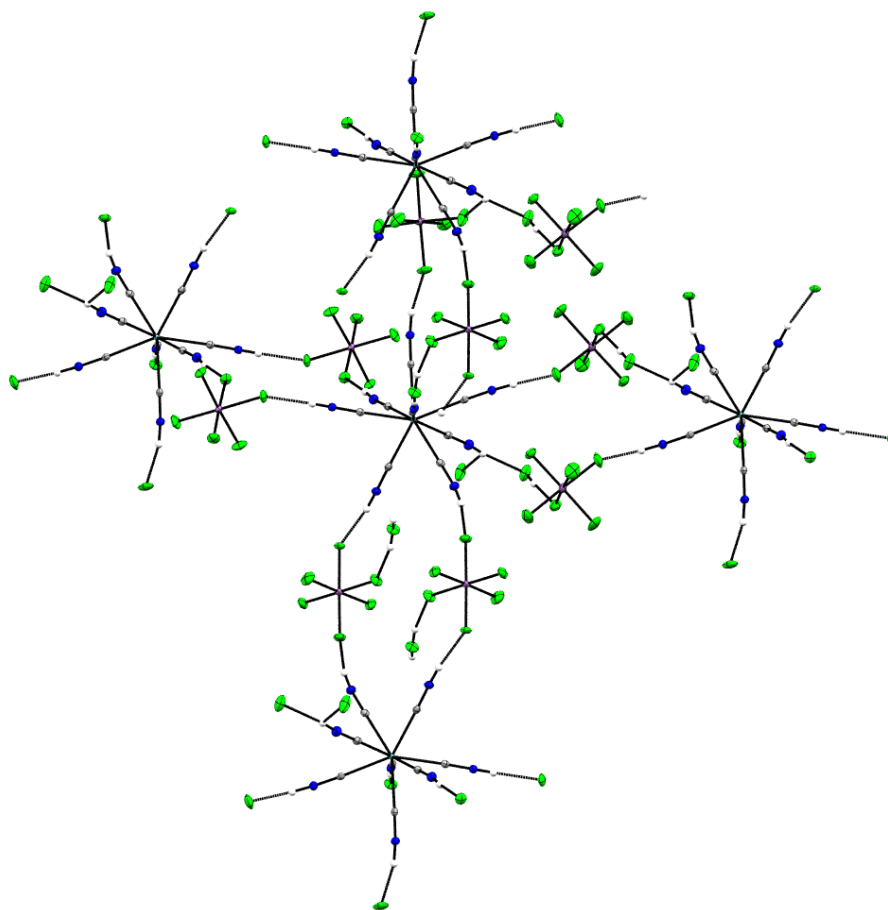

Figure S18. Hydrogen-bonded networks in  $[\text{Mo}(\text{CNH})_8]^{4+} [\text{SbF}_6]^{-4} \cdot 2\text{HF}$

## Octakis(hydrogenisocyanide)molybdenum(IV) hexafluoroantimonate HF solvate

### Crystal data

|                                                                                                              |                                                         |
|--------------------------------------------------------------------------------------------------------------|---------------------------------------------------------|
| MoC <sub>8</sub> N <sub>8</sub> H <sub>8</sub> Sb <sub>4</sub> F <sub>24</sub> H <sub>2</sub> F <sub>2</sub> | $F(000) = 2424$                                         |
| $M_r = 1295.16$                                                                                              | $D_x = 2.866 \text{ Mg m}^{-3}$                         |
| Monoclinic, $P2_1/n$                                                                                         | Mo $K\alpha$ radiation, $\lambda = 0.71073 \text{ \AA}$ |
| $a = 10.9426 (8) \text{ \AA}$                                                                                | Cell parameters from 9834 reflections                   |
| $b = 15.6430 (11) \text{ \AA}$                                                                               | $\theta = 2.5\text{--}30.6^\circ$                       |
| $c = 17.8663 (13) \text{ \AA}$                                                                               | $\mu = 4.13 \text{ mm}^{-1}$                            |
| $\beta = 91.087 (3)^\circ$                                                                                   | $T = 100 \text{ K}$                                     |
| $V = 3057.7 (4) \text{ \AA}^3$                                                                               | Block, yellow                                           |
| $Z = 4$                                                                                                      | $0.43 \times 0.32 \times 0.22 \text{ mm}$               |

### Data collection

|                                                     |                                                                        |
|-----------------------------------------------------|------------------------------------------------------------------------|
| Bruker D8 Venture diffractometer                    | 8465 reflections with $I > 2\sigma(I)$                                 |
| $\phi$ and $\omega$ scans                           | $R_{\text{int}} = 0.068$                                               |
| Absorption correction: multi-scan                   | $\theta_{\text{max}} = 30.6^\circ$ , $\theta_{\text{min}} = 2.2^\circ$ |
| $T_{\text{min}} = 0.501$ , $T_{\text{max}} = 0.746$ | $h = -15 \rightarrow 15$                                               |
| 259625 measured reflections                         | $k = -22 \rightarrow 22$                                               |
| 9400 independent reflections                        | $l = -25 \rightarrow 25$                                               |

### Refinement

|                                 |                                                                                     |
|---------------------------------|-------------------------------------------------------------------------------------|
| Refinement on $F^2$             | 0 restraints                                                                        |
| Least-squares matrix: full      | Hydrogen site location: difference Fourier map                                      |
| $R[F^2 > 2\sigma(F^2)] = 0.018$ | All H-atom parameters refined                                                       |
| $wR(F^2) = 0.042$               | $w = 1/[\sigma^2(F_o^2) + (0.0166P)^2 + 4.1529P]$<br>where $P = (F_o^2 + 2F_c^2)/3$ |
| $S = 1.09$                      | $(\Delta/\sigma)_{\text{max}} = 0.004$                                              |
| 9400 reflections                | $\Delta_{\text{max}} = 1.68 \text{ e \AA}^{-3}$                                     |
| 464 parameters                  | $\Delta_{\text{min}} = -1.37 \text{ e \AA}^{-3}$                                    |

The structure was refined with the expected Mo-CN<sub>H</sub> geometry as well as Mo-NCH:

Mo-CN<sub>H</sub> Isomer (carbon in grey, N in blue, H in white):

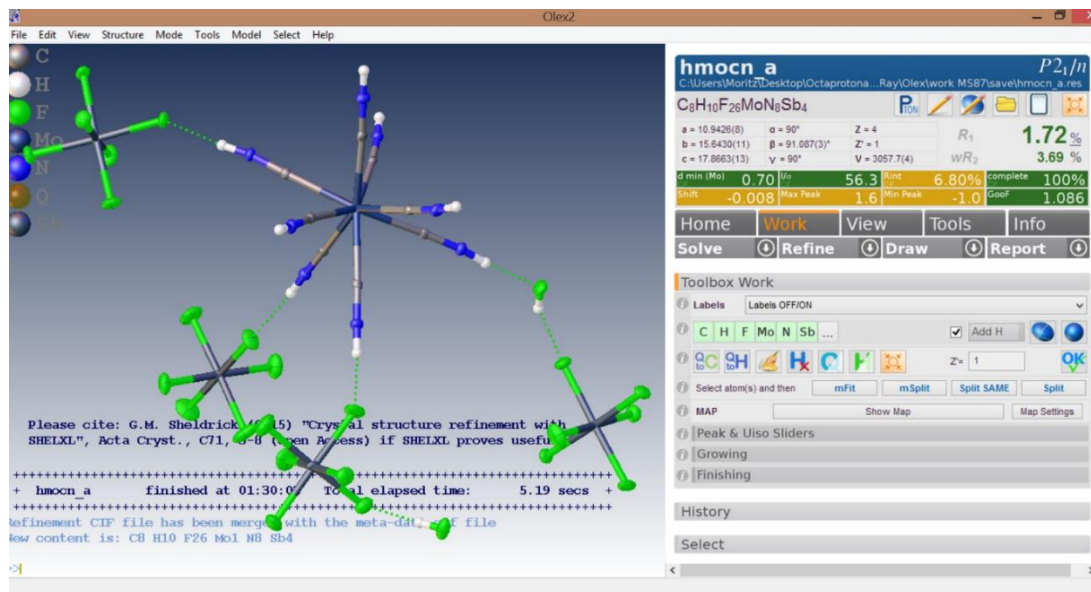

Figure S19. Structure refinement of [Mo(CNH)<sub>8</sub>]<sup>4+</sup> isomer (carbon in grey, N in blue, H in white)

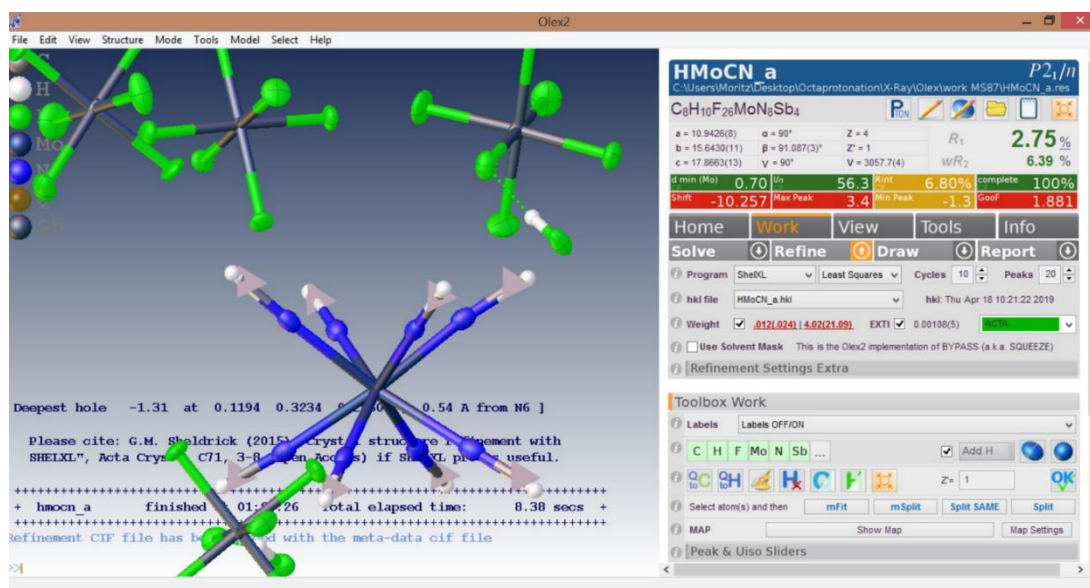

Figure S20. Structure refinement of [Mo(NCH)<sub>8</sub>]<sup>4+</sup> isomer (carbon in grey, N in blue, H in white)

Geometric parameters ( $\text{\AA}$ ,  $^\circ$ ) for [Mo(CNH)<sub>8</sub>]<sup>4+</sup> [SbF<sub>6</sub>]<sub>4</sub> • 2HF

|         |             |         |             |
|---------|-------------|---------|-------------|
| Sb01—F1 | 1.8586 (13) | Mo05—C1 | 2.143 (2)   |
| Sb01—F2 | 1.8645 (13) | Mo05—C3 | 2.146 (2)   |
| Sb01—F4 | 1.8649 (13) | Mo05—C6 | 2.152 (2)   |
| Sb01—F3 | 1.8701 (13) | Mo05—C8 | 2.156 (2)   |
| Sb01—F5 | 1.9025 (12) | Mo05—C4 | 2.161 (2)   |
| Sb01—F6 | 1.9032 (12) | Mo05—C2 | 2.1617 (19) |
| Sb02—F7 | 1.8531 (14) | Mo05—C7 | 2.168 (2)   |



|          |             |         |           |
|----------|-------------|---------|-----------|
| Sb02—F11 | 1.8552 (13) | F26—H9  | 0.72 (4)  |
| Sb02—F8  | 1.8689 (13) | F25—H10 | 0.75 (4)  |
| Sb02—F10 | 1.8864 (12) | N6—C6   | 1.130 (3) |
| Sb02—F9  | 1.8906 (13) | N6—H6   | 0.87 (4)  |
| Sb02—F12 | 1.9027 (12) | N2—C2   | 1.128 (3) |
| Sb03—F24 | 1.8563 (15) | N2—H2   | 0.80 (4)  |
| Sb03—F21 | 1.8599 (14) | N4—C4   | 1.131 (3) |
| Sb03—F23 | 1.8648 (15) | N4—H4   | 0.78 (4)  |
| Sb03—F20 | 1.8704 (14) | N8—C8   | 1.136 (3) |
| Sb03—F22 | 1.8843 (14) | N8—H8   | 0.88 (3)  |
| Sb03—F19 | 1.8975 (14) | N3—C3   | 1.129 (3) |
| Sb04—F18 | 1.8616 (13) | N3—H3   | 0.82 (4)  |
| Sb04—F16 | 1.8650 (16) | N7—C7   | 1.131 (3) |
| Sb04—F13 | 1.8666 (15) | N7—H7   | 0.83 (4)  |
| Sb04—F17 | 1.8728 (14) | N5—C5   | 1.131 (3) |
| Sb04—F14 | 1.8972 (14) | N5—H5   | 0.80 (4)  |
| Sb04—F15 | 1.8986 (14) | N1—C1   | 1.134 (3) |
| Mo05—C5  | 2.140 (2)   | N1—H1   | 0.87 (4)  |

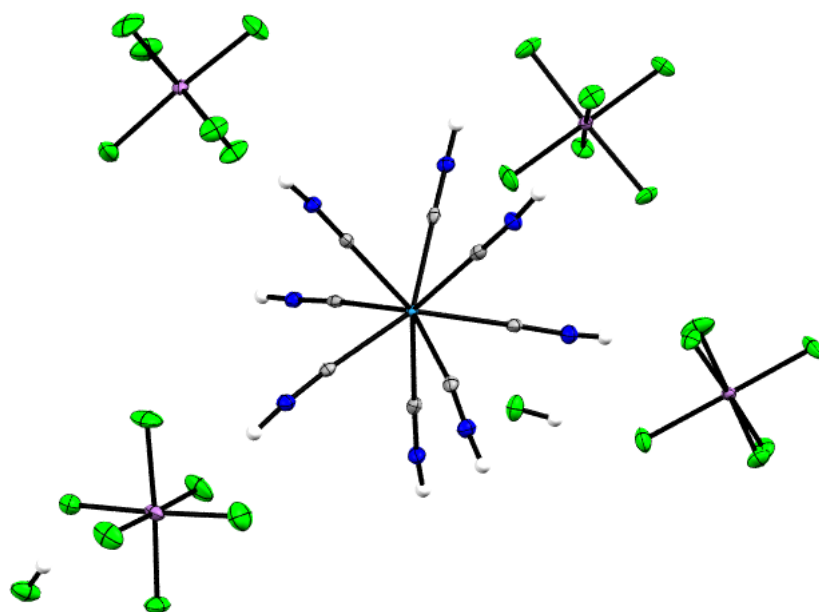

Figure S21: One formula unit in the crystal structure of  $[W(CNH)_8]^{4+} [SbF_6]^{-4} \cdot 2HF$ , ellipsoids shown at 50% probability, C grey, N blue, H white, W turquoise, F green, Sb lavender

## Octakis(hydrogenisocyanide)tungsten(IV) hexafluoroantimonate HF solvate

### Crystal data

|                                         |                                                         |
|-----------------------------------------|---------------------------------------------------------|
| $C_8H_8N_8W \cdot 4(F_6Sb) \cdot 2(FH)$ | $F(000) = 2504$                                         |
| $M_r = 1383.09$                         | $D_x = 2.994 \text{ Mg m}^{-3}$                         |
| Monoclinic, $P2_1/n$                    | Mo $K\alpha$ radiation, $\lambda = 0.71073 \text{ \AA}$ |
| $a = 10.9494 (18) \text{ \AA}$          | Cell parameters from 9999 reflections                   |
| $b = 15.681 (2) \text{ \AA}$            | $\theta = 2.3\text{--}31.1^\circ$                       |
| $c = 17.871 (2) \text{ \AA}$            | $\mu = 7.39 \text{ mm}^{-1}$                            |
| $\beta = 91.045 (5)^\circ$              | $T = 100 \text{ K}$                                     |
| $V = 3068.0 (8) \text{ \AA}^3$          | Block, clear yellow                                     |
| $Z = 4$                                 | $0.24 \times 0.23 \times 0.11 \text{ mm}$               |

### Data collection

|                                                     |                                                                        |
|-----------------------------------------------------|------------------------------------------------------------------------|
| Bruker D8 Venture diffractometer                    | $R_{\text{int}} = 0.072$                                               |
| Absorption correction: multi-scan                   | $\theta_{\text{max}} = 31.1^\circ$ , $\theta_{\text{min}} = 2.3^\circ$ |
| $T_{\text{min}} = 0.401$ , $T_{\text{max}} = 0.746$ | $h = -15 \rightarrow 15$                                               |
| 153354 measured reflections                         | $k = -22 \rightarrow 22$                                               |
| 9841 independent reflections                        | $l = -25 \rightarrow 25$                                               |
| 8997 reflections with $I > 2\sigma(I)$              |                                                                        |

### Refinement

|                                                                |                                                                                                                                      |
|----------------------------------------------------------------|--------------------------------------------------------------------------------------------------------------------------------------|
| Refinement on $F^2$                                            | Hydrogen site location: difference Fourier map                                                                                       |
| Least-squares matrix: full                                     | All H-atom parameters refined                                                                                                        |
| $R[F^2 > 2\sigma(F^2)] = 0.018$                                | $w = 1/[\sigma^2(F_o^2) + (0.0123P)^2 + 2.6019P]$<br>where $P = (F_o^2 + 2F_c^2)/3$                                                  |
| $wR(F^2) = 0.039$                                              | $(\Delta/\sigma)_{\text{max}} = 0.002$                                                                                               |
| $S = 1.10$                                                     | $\Delta_{\text{max}} = 1.32 \text{ e \AA}^{-3}$                                                                                      |
| 9841 reflections                                               | $\Delta_{\text{min}} = -1.18 \text{ e \AA}^{-3}$                                                                                     |
| 465 parameters                                                 | Extinction correction: <i>SHELXL2018/1</i><br>(Sheldrick 2018),<br>$F_c^* = kF_c[1 + 0.001x F_c^2 \lambda^3 / \sin(2\theta)]^{-1/4}$ |
| 0 restraints                                                   | Extinction coefficient: 0.00089 (3)                                                                                                  |
| Primary atom site location: structure-invariant direct methods |                                                                                                                                      |

The structure was refined with the expected W-CN<sub>H</sub> geometry as well as W-NCH:

W-CN<sub>H</sub> Isomer (carbon in grey, N in blue, H in white):

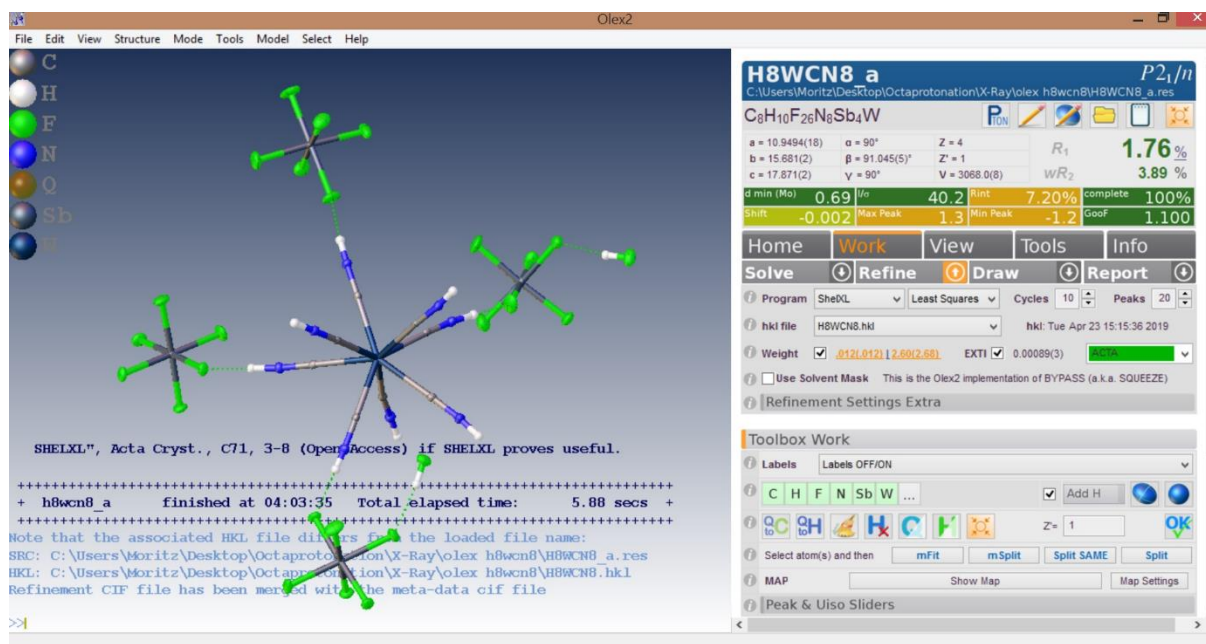

Figure S22. Structure refinement of [W(CNH)<sub>8</sub>]<sup>4+</sup>

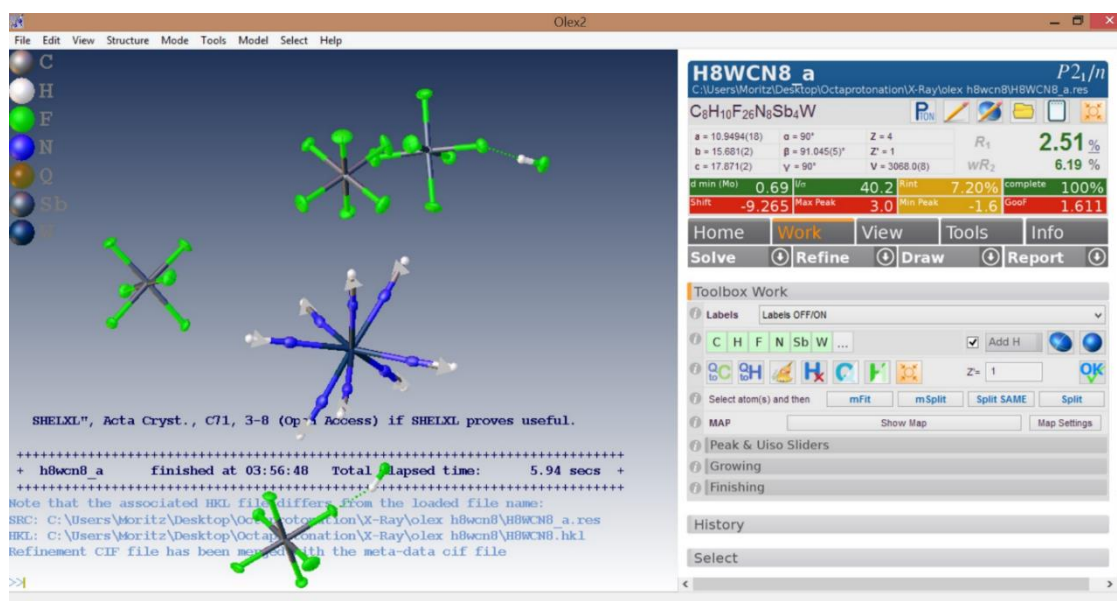

Figure S23. Structure refinement of [W(NCH)<sub>8</sub>]<sup>4+</sup> (carbon in grey, N in blue, H in white):

Geometric parameters (Å, °) for [W(CNH)<sub>8</sub>]<sup>4+</sup> [SbF<sub>6</sub>]<sup>-4</sup> • 2HF

|         |           |           |             |
|---------|-----------|-----------|-------------|
| W001—C5 | 2.142 (2) | Sb04—F00S | 1.8594 (15) |
| W001—C2 | 2.145 (2) | Sb05—F00F | 1.8661 (14) |
| W001—C1 | 2.157 (2) | Sb05—F00G | 1.8997 (15) |
| W001—C7 | 2.169 (2) | Sb05—F00K | 1.8795 (15) |
| W001—C6 | 2.149 (2) | Sb05—F00T | 1.8701 (15) |

|           |             |           |             |
|-----------|-------------|-----------|-------------|
| W001—C4   | 2.167 (2)   | Sb05—F00U | 1.9022 (15) |
| W001—C8   | 2.166 (2)   | Sb05—F00V | 1.8636 (17) |
| W001—C3   | 2.163 (2)   | F00E—H00E | 0.81 (4)    |
| Sb02—F006 | 1.8901 (13) | F00H—H00H | 0.81 (4)    |
| Sb02—F007 | 1.8603 (14) | N4—C4     | 1.129 (3)   |
| Sb02—F009 | 1.9023 (13) | N4—H4     | 0.86 (4)    |
| Sb02—F00A | 1.8700 (14) | N8—C8     | 1.132 (3)   |
| Sb02—F00M | 1.8927 (14) | N8—H8     | 0.87 (4)    |
| Sb02—F00O | 1.8558 (15) | N7—C7     | 1.134 (3)   |
| Sb03—F008 | 1.9046 (14) | N7—H7     | 0.94 (4)    |
| Sb03—F00C | 1.8620 (14) | N3—C3     | 1.127 (3)   |
| Sb03—F00D | 1.9043 (13) | N3—H3     | 0.91 (4)    |
| Sb03—F00I | 1.8686 (14) | N2—C2     | 1.135 (3)   |
| Sb03—F00L | 1.8671 (14) | N2—H2     | 0.77 (4)    |
| Sb03—F00P | 1.8706 (14) | C5—N5     | 1.137 (3)   |
| Sb04—F00B | 1.8856 (15) | N1—C1     | 1.137 (3)   |
| Sb04—F00J | 1.9010 (14) | N1—H1     | 0.87 (4)    |
| Sb04—F00N | 1.8626 (15) | N5—H5     | 0.88 (4)    |
| Sb04—F00Q | 1.8697 (15) | N6—C6     | 1.136 (3)   |
| Sb04—F00R | 1.8750 (15) | N6—H6     | 0.75 (4)    |

## 5. Continuous Shape-Measurements

Continuous-Shape Measurements were performed with the Programm Shape (v.2.1).<sup>[8]</sup>

For the MoC<sub>8</sub> fragment in [Mo(CNH)<sub>8</sub>]<sup>4+</sup> [SbF<sub>6</sub>]<sub>4</sub><sup>-</sup> • 2HF:

Ideal structures ML8

SAPR-8 5 D4d Square antiprism

TDD-8 6 D2d Triangular dodecahedron

JGBF-8 7 D2d Johnson gyrobifastigium J26

JETBPY-8 8 D3h Johnson elongated triangular bipyramid J14

JBTPR-8 9 C2v Biaugmented trigonal prism J50

BTPR-8 10 C2v Biaugmented trigonal prism

JSD-8 11 D2d Snub diphenoid J84

-----

Structure 1 [H8Mo]

|    |  |        |        |         |
|----|--|--------|--------|---------|
| Mo |  | 5.1065 | 2.4284 | 12.2447 |
| C  |  | 5.9948 | 4.0999 | 11.2213 |
| C  |  | 3.1999 | 1.4825 | 12.5214 |
| C  |  | 3.9862 | 2.5422 | 10.4001 |
| C  |  | 5.5995 | 0.4585 | 12.9860 |
| C  |  | 7.0206 | 2.8251 | 13.1534 |
| C  |  | 6.2851 | 1.4691 | 10.7335 |
| C  |  | 4.7680 | 2.5451 | 14.3830 |
| C  |  | 3.9013 | 4.1716 | 12.5404 |

SAPR-8 Ideal structure CShM = 0.37374

|    |    |        |        |         |
|----|----|--------|--------|---------|
| Mo | M  | 5.0958 | 2.4469 | 12.2427 |
| C  | L1 | 5.9917 | 4.1055 | 11.2101 |
| C  | L7 | 3.1901 | 1.5248 | 12.6138 |
| C  | L6 | 4.0302 | 2.5915 | 10.3817 |
| C  | L8 | 5.5575 | 0.4939 | 13.0121 |
| C  | L4 | 7.0717 | 2.6222 | 13.0701 |
| C  | L5 | 6.3976 | 1.5606 | 10.7800 |
| C  | L3 | 4.8037 | 2.5969 | 14.3668 |
| C  | L2 | 3.7237 | 4.0801 | 12.5068 |

TDD-8 Ideal structure CShM = 1.64179

|    |    |        |        |         |
|----|----|--------|--------|---------|
| Mo | M  | 5.0958 | 2.4469 | 12.2427 |
| C  | L1 | 6.1288 | 3.9059 | 11.0741 |
| C  | L7 | 3.3862 | 1.1825 | 12.4405 |
| C  | L3 | 3.8905 | 2.7932 | 10.5139 |
| C  | L6 | 5.8014 | 0.6099 | 13.0722 |
| C  | L5 | 6.8809 | 2.9199 | 13.3151 |
| C  | L2 | 6.0253 | 1.3835 | 10.6409 |
| C  | L8 | 4.5624 | 2.4789 | 14.3104 |
| C  | L4 | 4.0907 | 4.3018 | 12.5741 |

JGBF-8 Ideal structure CShM = 15.78434

|    |    |        |        |         |
|----|----|--------|--------|---------|
| Mo | M  | 5.0958 | 2.4469 | 12.2427 |
| C  | L1 | 5.5531 | 4.3512 | 11.0716 |
| C  | L5 | 3.5412 | 2.0428 | 12.0899 |
| C  | L2 | 4.4215 | 2.6407 | 10.0714 |
| C  | L7 | 6.1930 | 0.9469 | 13.5665 |
| C  | L3 | 6.6503 | 2.8511 | 12.3954 |
| C  | L6 | 5.5187 | 1.1407 | 11.3952 |
| C  | L8 | 4.2155 | 1.8490 | 14.2611 |
| C  | L4 | 4.6728 | 3.7532 | 13.0901 |

JETBPY-8 Ideal structure CShM = 28.65716

|    |    |        |        |         |
|----|----|--------|--------|---------|
| Mo | M  | 5.0958 | 2.4469 | 12.2427 |
| C  | L1 | 5.3304 | 3.9124 | 12.1267 |
| C  | L3 | 3.7772 | 2.9143 | 12.7516 |
| C  | L5 | 4.4271 | 2.6662 | 10.9308 |
| C  | L8 | 6.6340 | 0.5581 | 13.0491 |
| C  | L2 | 6.4988 | 2.4777 | 12.7393 |
| C  | L6 | 5.5955 | 1.2315 | 11.5434 |
| C  | L4 | 4.9456 | 1.4796 | 13.3642 |
| C  | L7 | 3.5575 | 4.3358 | 11.4362 |

JBTPR-8 Ideal structure CShM = 2.25289

|    |    |        |        |         |
|----|----|--------|--------|---------|
| Mo | M  | 5.0165 | 2.2105 | 12.0998 |
| C  | L7 | 6.0913 | 4.1906 | 10.8286 |
| C  | L5 | 3.2163 | 1.5755 | 12.6408 |
| C  | L3 | 4.0489 | 2.6378 | 10.4211 |
| C  | L6 | 5.5704 | 0.5493 | 13.0327 |
| C  | L2 | 6.6073 | 2.9312 | 13.0414 |
| C  | L4 | 6.4030 | 1.6116 | 10.8130 |
| C  | L8 | 4.6553 | 2.3585 | 14.6570 |
| C  | L1 | 4.2531 | 3.9574 | 12.6495 |

BTPR-8 Ideal structure CShM = 1.63290

|    |    |        |        |         |
|----|----|--------|--------|---------|
| Mo | M  | 5.0297 | 2.2502 | 12.1242 |
| C  | L7 | 5.9223 | 3.8947 | 11.0639 |
| C  | L5 | 3.0789 | 1.5631 | 12.7139 |
| C  | L3 | 3.9788 | 2.7108 | 10.3051 |
| C  | L6 | 5.6310 | 0.4510 | 13.1376 |
| C  | L2 | 6.7553 | 3.0328 | 13.1418 |
| C  | L4 | 6.5310 | 1.5987 | 10.7288 |
| C  | L8 | 4.7318 | 2.3764 | 14.2504 |
| C  | L1 | 4.2032 | 4.1448 | 12.7181 |

JSD-8 Ideal structure CShM = 4.27948

|    |    |        |        |         |
|----|----|--------|--------|---------|
| Mo | M  | 5.0958 | 2.4469 | 12.2427 |
| C  | L1 | 6.1212 | 4.0868 | 10.8062 |
| C  | L3 | 3.6650 | 1.4378 | 12.3285 |
| C  | L2 | 3.8584 | 2.9588 | 10.2399 |
| C  | L5 | 5.8292 | 0.4280 | 13.3335 |
| C  | L4 | 6.5821 | 2.8919 | 13.0586 |
| C  | L7 | 5.8769 | 1.5133 | 10.9812 |
| C  | L6 | 4.5743 | 2.3141 | 14.5909 |
| C  | L8 | 4.2591 | 3.9448 | 12.6022 |

For the  $WC_8$  fragment in  $[W(CNH)_8]^{4+} [SbF_6]_4^- \cdot 2HF$ :

Ideal structures ML8

|          |    |     |                                            |
|----------|----|-----|--------------------------------------------|
| SAPR-8   | 5  | D4d | Square antiprism                           |
| TDD-8    | 6  | D2d | Triangular dodecahedron                    |
| JGBF-8   | 7  | D2d | Johnson gyrobifastigium J26                |
| JETBPY-8 | 8  | D3h | Johnson elongated triangular bipyramid J14 |
| JBTPR-8  | 9  | C2v | Biaugmented trigonal prism J50             |
| BTPR-8   | 10 | C2v | Biaugmented trigonal prism                 |
| JSD-8    | 11 | D2d | Snub diphenooid J84                        |

---

Structure 1 [H8W]

|   |        |        |        |
|---|--------|--------|--------|
| W | 5.2862 | 2.4335 | 3.3141 |
| C | 6.1791 | 4.1145 | 2.2863 |
| C | 5.7778 | 0.4592 | 4.0579 |
| C | 4.1622 | 2.5514 | 1.4624 |
| C | 3.3793 | 1.4824 | 3.5948 |
| C | 4.9513 | 2.5487 | 5.4534 |
| C | 7.2008 | 2.8306 | 4.2247 |
| C | 6.4673 | 1.4723 | 1.8030 |
| C | 4.0784 | 4.1780 | 3.6114 |

SAPR-8 Ideal structure CShM = 0.36936

|   |    |        |        |        |
|---|----|--------|--------|--------|
| W | M  | 5.2758 | 2.4523 | 3.3120 |
| C | L1 | 6.1730 | 4.1146 | 2.2778 |
| C | L7 | 5.7390 | 0.4952 | 4.0822 |
| C | L5 | 4.2077 | 2.5976 | 1.4476 |
| C | L8 | 3.3667 | 1.5278 | 3.6840 |
| C | L3 | 4.9836 | 2.6018 | 5.4404 |
| C | L2 | 7.2558 | 2.6280 | 4.1407 |
| C | L6 | 6.5800 | 1.5650 | 1.8458 |
| C | L4 | 3.9008 | 4.0884 | 3.5775 |

TDD-8 Ideal structure CShM = 1.64023

|   |    |        |        |        |
|---|----|--------|--------|--------|
| W | M  | 5.2758 | 2.4523 | 3.3120 |
| C | L1 | 6.3103 | 3.9148 | 2.1415 |
| C | L6 | 5.9836 | 0.6116 | 4.1426 |
| C | L3 | 4.0679 | 2.7993 | 1.5801 |
| C | L7 | 3.5633 | 1.1848 | 3.5100 |
| C | L8 | 4.7416 | 2.4835 | 5.3838 |

|   |    |        |        |        |
|---|----|--------|--------|--------|
| C | L5 | 7.0644 | 2.9264 | 4.3866 |
| C | L2 | 6.2074 | 1.3876 | 1.7067 |
| C | L4 | 4.2682 | 4.3104 | 3.6448 |

JGBF-8 Ideal structure CShM = 15.77540

|   |    |        |        |        |
|---|----|--------|--------|--------|
| W | M  | 5.2758 | 2.4523 | 3.3120 |
| C | L1 | 5.7336 | 4.3611 | 2.1396 |
| C | L7 | 6.3757 | 0.9487 | 4.6376 |
| C | L2 | 4.5999 | 2.6476 | 1.1365 |
| C | L5 | 3.7182 | 2.0471 | 3.1588 |
| C | L8 | 4.3941 | 1.8518 | 5.3343 |
| C | L3 | 6.8335 | 2.8575 | 3.4652 |
| C | L6 | 5.6998 | 1.1440 | 2.4621 |
| C | L4 | 4.8519 | 3.7607 | 4.1619 |

JETBPY-8 Ideal structure CShM = 28.67483

|   |    |        |        |        |
|---|----|--------|--------|--------|
| W | M  | 5.2758 | 2.4523 | 3.3120 |
| C | L1 | 5.5108 | 3.9205 | 3.1961 |
| C | L8 | 6.8171 | 0.5598 | 4.1191 |
| C | L3 | 4.6056 | 2.6723 | 1.9980 |
| C | L5 | 3.9550 | 2.9204 | 3.8223 |
| C | L6 | 5.1257 | 1.4829 | 4.4354 |
| C | L2 | 6.6816 | 2.4830 | 3.8092 |
| C | L4 | 5.7763 | 1.2348 | 2.6111 |
| C | L7 | 3.7345 | 4.3448 | 2.5049 |

JBTPR-8 Ideal structure CShM = 2.23604

|   |    |        |        |        |
|---|----|--------|--------|--------|
| W | M  | 5.1964 | 2.2154 | 3.1687 |
| C | L7 | 6.2726 | 4.2005 | 1.8957 |
| C | L5 | 5.7521 | 0.5506 | 4.1026 |
| C | L4 | 4.2264 | 2.6442 | 1.4871 |
| C | L6 | 3.3928 | 1.5784 | 3.7109 |
| C | L8 | 4.8349 | 2.3623 | 5.7313 |
| C | L1 | 6.7904 | 2.9376 | 4.1123 |
| C | L3 | 6.5856 | 1.6163 | 1.8788 |
| C | L2 | 4.4312 | 3.9655 | 3.7206 |

BTPR-8 Ideal structure CShM = 1.62526

|   |    |        |        |        |
|---|----|--------|--------|--------|
| W | M  | 5.2097 | 2.2552 | 3.1932 |
| C | L7 | 6.1035 | 3.9038 | 2.1315 |
| C | L5 | 5.8128 | 0.4521 | 4.2077 |
| C | L4 | 4.1563 | 2.7173 | 1.3709 |
| C | L6 | 3.2552 | 1.5659 | 3.7841 |
| C | L8 | 4.9114 | 2.3806 | 5.3238 |
| C | L1 | 6.9386 | 3.0393 | 4.2130 |
| C | L3 | 6.7139 | 1.6035 | 1.7945 |
| C | L2 | 4.3811 | 4.1531 | 3.7894 |



JSD-8 Ideal structure CShM = 4.24788

|   |    |        |        |        |
|---|----|--------|--------|--------|
| W | M  | 5.2758 | 2.4523 | 3.3120 |
| C | L1 | 6.3030 | 4.0965 | 1.8731 |
| C | L5 | 6.0114 | 0.4288 | 4.4043 |
| C | L2 | 4.0356 | 2.9658 | 1.3053 |
| C | L3 | 3.8422 | 1.4406 | 3.3977 |
| C | L6 | 4.7534 | 2.3181 | 5.6653 |
| C | L4 | 6.7653 | 2.8982 | 4.1298 |
| C | L7 | 6.0587 | 1.5174 | 2.0475 |
| C | L8 | 4.4370 | 3.9530 | 3.6731 |

## 6. DFT-Calculations

Structure optimizations and frequency calculations were performed using Gaussian16<sup>[9]</sup> and M06L/Def2TZVP. Calculated frequencies were corrected by a scaling factor of 0.9965.<sup>[10]</sup>

### XYZ-coordinates of optimized Structures in Å

[Mo(CNH)<sub>8</sub>]<sup>4+</sup> E=-814.342 Hartree symmetry: C<sub>1</sub> but very close to D<sub>4d</sub>

Mo-C 2.203 Å, C-N 1.146 Å, N-H 1.017 Å

Mo-C-N 179.9°, C-N-H 179.6°

C-Mo-C 72.4° (8x), 79.0° (8x), 113.3° (4x) 142.7° (8x)

Most intense IR frequencies: 689, 690, 696, 738, 741, 2241, 2245, 3554, 3556 cm<sup>-1</sup>

|    |              |              |              |
|----|--------------|--------------|--------------|
| 42 | 0.000001000  | -0.000002000 | 0.000028000  |
| 7  | -2.253071000 | -1.661508000 | 1.839011000  |
| 7  | -1.661293000 | 2.253158000  | 1.839089000  |
| 7  | -2.768250000 | 0.418085000  | -1.838761000 |
| 7  | 0.418007000  | 2.767722000  | -1.839528000 |
| 7  | -0.418031000 | -2.767793000 | -1.839430000 |
| 7  | 2.768218000  | -0.418141000 | -1.838807000 |
| 7  | 1.661316000  | -2.253072000 | 1.839172000  |
| 7  | 2.253082000  | 1.661557000  | 1.838954000  |
| 6  | -1.481225000 | -1.092543000 | 1.211299000  |
| 6  | -1.092400000 | 1.481285000  | 1.211344000  |
| 6  | -1.820123000 | 0.274738000  | -1.211077000 |
| 6  | 0.274674000  | 1.819768000  | -1.211577000 |
| 6  | -0.274690000 | -1.819821000 | -1.211502000 |
| 6  | 1.820104000  | -0.274775000 | -1.211109000 |
| 6  | 1.092413000  | -1.481235000 | 1.211393000  |
| 6  | 1.481237000  | 1.092580000  | 1.211252000  |
| 1  | -0.544922000 | -3.604547000 | -2.402698000 |
| 1  | 2.934313000  | 2.163728000  | 2.402227000  |
| 1  | -2.934354000 | -2.163734000 | 2.402172000  |
| 1  | 0.545076000  | 3.604552000  | -2.402639000 |
| 1  | 3.605278000  | -0.545104000 | -2.401602000 |
| 1  | -3.605301000 | 0.545022000  | -2.401575000 |
| 1  | -2.163378000 | 2.934418000  | 2.402402000  |
| 1  | 2.163470000  | -2.934288000 | 2.402477000  |

[Mo(NCH)<sub>8</sub>]<sup>4+</sup> E=-814.386 Hartree

symmetry: C<sub>1</sub> but very close to D<sub>4d</sub>

Mo-N 2.172 Å, N-C 1.145 Å, C-H 1.085 Å

Mo-N-C 179.9°, N-C-H 179.7°

N-Mo-N 73.3° (8x), 77.4° (8x), 115.2° (4x), 142.3° (8x)

Most intense IR frequencies: 429, 830, 833, 856, 859, 2207, 2209, 3271, 3273, 3274, 3280 cm<sup>-1</sup>

|    |              |              |              |
|----|--------------|--------------|--------------|
| 42 | 0.000024000  | 0.000058000  | 0.000093000  |
| 7  | 1.739048000  | -0.584443000 | -1.162807000 |
| 7  | 0.584323000  | 1.738652000  | -1.163428000 |
| 7  | 1.642638000  | 0.816686000  | 1.162965000  |
| 7  | -0.816470000 | 1.642494000  | 1.163241000  |
| 7  | 0.816346000  | -1.642412000 | 1.163319000  |
| 7  | -1.642722000 | -0.816612000 | 1.162780000  |
| 7  | -0.584198000 | -1.738549000 | -1.163484000 |
| 7  | -1.738916000 | 0.584507000  | -1.162980000 |
| 6  | 2.654963000  | -0.893350000 | -1.777219000 |
| 6  | 0.893035000  | 2.654359000  | -1.778249000 |
| 6  | 2.508420000  | 1.246299000  | 1.777517000  |
| 6  | -1.246035000 | 2.508157000  | 1.777996000  |
| 6  | 1.245806000  | -2.508170000 | 1.778015000  |
| 6  | -2.508485000 | -1.246318000 | 1.777293000  |
| 6  | -0.892939000 | -2.654351000 | -1.778149000 |
| 6  | -2.654775000 | 0.893264000  | -1.777549000 |
| 1  | 1.183348000  | 3.519354000  | -2.365741000 |
| 1  | -1.183582000 | -3.519752000 | -2.364877000 |
| 1  | -3.325949000 | -1.651791000 | 2.364665000  |
| 1  | 3.326559000  | 1.650696000  | 2.364691000  |
| 1  | 1.650214000  | -3.326341000 | 2.365135000  |
| 1  | -3.520449000 | 1.183096000  | -2.364279000 |
| 1  | 3.519777000  | -1.184804000 | -2.364416000 |
| 1  | -1.651196000 | 3.325512000  | 2.365734000  |

[Mo(CNH)<sub>8</sub>]<sup>4+</sup> • 8 HF E=-1618.352 Hartree Symmetry: C<sub>1</sub>

Mo-C 2.188-2.189 Å, C-N 1.147 Å, N-H 1.049-1.050 Å, H...F 1.547-1.551 Å, H-F 0.930 Å

Mo-C-N 178.9-179.3°, C-N-H 177.5-177.9°, N-H...F 166.1-167.1°

C-Mo-C 72.4-72.9° (8x), 78.5-78.8° (8x), 113.5-114.0° (4x), 142.2-143.1° (8x)

Most intense IR frequencies: 403, 408, 416, 428, 888, 953, 962, 964, 972, 983, 987, 2196, 2200, 2988-3002, 3957-3959 cm<sup>-1</sup>

|    |              |              |              |
|----|--------------|--------------|--------------|
| 42 | 0.000768000  | -0.058754000 | -0.005596000 |
| 9  | -3.596017000 | 3.666451000  | -2.818576000 |
| 9  | -3.818110000 | -3.295553000 | -3.110014000 |
| 9  | 5.103897000  | -0.232053000 | 2.936598000  |
| 9  | -0.359576000 | -5.238622000 | 2.782230000  |
| 9  | 3.242318000  | 3.850033000  | -2.993021000 |
| 9  | 0.414677000  | 4.818280000  | 3.276078000  |
| 9  | -4.969308000 | 0.435356000  | 3.116133000  |
| 9  | 3.968177000  | -3.113767000 | -3.106792000 |
| 7  | -0.057610000 | -2.880751000 | 1.772032000  |
| 7  | -2.841744000 | -0.058848000 | 1.740162000  |
| 7  | -1.941705000 | -1.997518000 | -1.900806000 |
| 7  | -1.937434000 | 1.955388000  | -1.827436000 |
| 7  | 2.051945000  | -1.997272000 | -1.784913000 |
| 7  | 2.007979000  | 1.951283000  | -1.754554000 |
| 7  | 2.756719000  | -0.071643000 | 1.874544000  |
| 7  | -0.031109000 | 2.716089000  | 1.846135000  |
| 6  | -0.031900000 | -1.904581000 | 1.169738000  |
| 6  | -1.860442000 | -0.069314000 | 1.145903000  |
| 6  | -1.263107000 | -1.333260000 | -1.256871000 |
| 6  | -1.267606000 | 1.256756000  | -1.211540000 |
| 6  | 1.335678000  | -1.336538000 | -1.179424000 |
| 6  | 1.319641000  | 1.251507000  | -1.160622000 |
| 6  | 1.802659000  | -0.066814000 | 1.237398000  |
| 6  | -0.027167000 | 1.758619000  | 1.214179000  |
| 1  | -3.731735000 | -0.004358000 | 2.293046000  |
| 1  | 3.649305000  | -0.088293000 | 2.425962000  |
| 1  | 2.608606000  | 2.622399000  | -2.293119000 |
| 1  | -2.596126000 | -2.585899000 | -2.471496000 |
| 1  | 2.736244000  | -2.565431000 | -2.340910000 |
| 1  | 0.006115000  | 3.586468000  | 2.431320000  |
| 1  | -0.104588000 | -3.788877000 | 2.294679000  |
| 1  | -2.565026000 | 2.607986000  | -2.358313000 |
| 1  | -3.919792000 | 4.034220000  | -3.609558000 |
| 1  | -4.004807000 | -3.909236000 | -3.783953000 |
| 1  | 5.591984000  | -0.098838000 | 3.717452000  |
| 1  | -0.178538000 | -5.776325000 | 3.519667000  |
| 1  | 3.991259000  | 4.058926000  | -3.504054000 |
| 1  | 0.011337000  | 5.520800000  | 3.733778000  |
| 1  | -5.720949000 | 0.057198000  | 3.513373000  |
| 1  | 4.224117000  | -3.869553000 | -3.585293000 |

[Mo(NCH)<sub>8</sub>]<sup>4+</sup> • 8 HF E=-1618.359 Hartree Symmetry: C<sub>1</sub>

Mo-N 2.160-2.161 Å, N-C 1.146 Å, C-H 1.107 Å, H...F 1.666-1.668 Å, H-F 0.929 Å

Mo-N-C 178.5-178.7°, N-C-H 179.0-179.2°, C-H-F 164.1-164.6°

N-Mo-N 73.5° (8x), 77.2-77.3° (8x), 115.5-115.6° (4x), 142.2-142.3° (8x)

Most intense IR frequencies: 405, 455, 965, 2152-2158, 2966-2976, 3973-3977 cm<sup>-1</sup>

|    |              |              |              |
|----|--------------|--------------|--------------|
| 42 | 0.011161000  | 0.003943000  | -0.005103000 |
| 9  | -0.060929000 | 5.344833000  | -2.798756000 |
| 9  | 3.734092000  | -3.833966000 | 2.775857000  |
| 9  | -4.039023000 | -3.419507000 | 2.855045000  |
| 9  | -5.349042000 | -0.242310000 | -2.745118000 |
| 9  | 3.926348000  | 3.720542000  | 2.671837000  |
| 9  | -3.737228000 | 3.918569000  | 2.625856000  |
| 9  | 5.405639000  | -0.130998000 | -2.686465000 |
| 9  | -0.049420000 | -5.421457000 | -2.622514000 |
| 7  | -1.288559000 | -1.269687000 | 1.160505000  |
| 7  | -1.282316000 | 1.314769000  | 1.126137000  |
| 7  | -1.814105000 | -0.007739000 | -1.161788000 |
| 7  | 0.017663000  | 1.816657000  | -1.181704000 |
| 7  | 0.010625000  | -1.838750000 | -1.133384000 |
| 7  | 1.843152000  | -0.014501000 | -1.150911000 |
| 7  | 1.297375000  | -1.276215000 | 1.167999000  |
| 7  | 1.303199000  | 1.309245000  | 1.133927000  |
| 6  | -1.996748000 | -1.943508000 | 1.759139000  |
| 6  | -1.977689000 | 2.021750000  | 1.701088000  |
| 6  | -2.796649000 | -0.022609000 | -1.751976000 |
| 6  | 0.017701000  | 2.791700000  | -1.784357000 |
| 6  | 0.008959000  | -2.831731000 | -1.706016000 |
| 6  | 2.830028000  | -0.027945000 | -1.733839000 |
| 6  | 1.988245000  | -1.966128000 | 1.768546000  |
| 6  | 2.001702000  | 2.008666000  | 1.714281000  |
| 1  | -0.019123000 | 5.943074000  | -3.508628000 |
| 1  | 4.194858000  | -4.221003000 | 3.483982000  |
| 1  | -4.376980000 | -3.986544000 | 3.509096000  |
| 1  | -5.965173000 | -0.162014000 | -3.436126000 |
| 1  | 4.310219000  | 4.215370000  | 3.358382000  |
| 1  | -4.201439000 | 4.330814000  | 3.317318000  |
| 1  | 6.020707000  | -0.104899000 | -3.382571000 |
| 1  | -0.022532000 | -6.042827000 | -3.312984000 |
| 1  | 0.004782000  | -3.799370000 | -2.243720000 |
| 1  | 2.686874000  | 2.685157000  | 2.260417000  |
| 1  | -2.695611000 | -2.586888000 | 2.327606000  |
| 1  | 0.014029000  | 3.741664000  | -2.352625000 |
| 1  | 3.791525000  | -0.044063000 | -2.282132000 |
| 1  | -3.753429000 | -0.045794000 | -2.308425000 |
| 1  | -2.652762000 | 2.713239000  | 2.241224000  |
| 1  | 2.658843000  | -2.640519000 | 2.335207000  |

[W(CNH)<sub>8</sub>]<sup>4+</sup> E=-813.253 Hartree

symmetry: C<sub>1</sub> but very close to D<sub>4d</sub>

W-C 2.211 Å, C-N 1.147 Å, N-H 1.016 Å

W-C-N 179.9°, C-N-H 179.5-179.7°

C-W-C 72.4° (8x), 79.0° (8x), 113.3° (4x) 142.7° (8x)

Most intense IR frequencies: 679-681, 742-745, 2236-2239, 3554-3557 cm<sup>-1</sup>

|    |              |              |              |
|----|--------------|--------------|--------------|
| 74 | -0.000061000 | -0.000064000 | 0.000108000  |
| 7  | 2.749704000  | 0.554201000  | -1.845215000 |
| 7  | -0.556813000 | 2.747574000  | -1.847235000 |
| 7  | 1.554405000  | 2.337338000  | 1.842068000  |
| 7  | -2.335140000 | 1.555450000  | 1.843800000  |
| 7  | 2.338545000  | -1.551405000 | 1.843286000  |
| 7  | -1.552749000 | -2.334526000 | 1.847221000  |
| 7  | 0.554215000  | -2.750994000 | -1.843171000 |
| 7  | -2.751834000 | -0.557014000 | -1.841200000 |
| 6  | 1.810205000  | 0.365163000  | -1.215790000 |
| 6  | -0.366946000 | 1.808618000  | -1.217240000 |
| 6  | 1.022794000  | 1.539237000  | 1.213568000  |
| 6  | -1.537569000 | 1.023437000  | 1.214954000  |
| 6  | 1.538986000  | -1.021467000 | 1.215233000  |
| 6  | -1.021795000 | -1.537269000 | 1.217110000  |
| 6  | 0.365309000  | -1.810957000 | -1.214497000 |
| 6  | -1.811444000 | -0.367151000 | -1.213339000 |
| 1  | 3.047294000  | -2.016769000 | 2.403925000  |
| 1  | -3.580701000 | -0.724527000 | -2.405160000 |
| 1  | 3.577691000  | 0.721217000  | -2.410635000 |
| 1  | -3.038268000 | 2.024438000  | 2.408436000  |
| 1  | -2.021149000 | -3.037708000 | 2.412300000  |
| 1  | 2.023145000  | 3.040606000  | 2.406762000  |
| 1  | -0.724377000 | 3.575195000  | -2.413019000 |
| 1  | 0.721277000  | -3.579736000 | -2.407466000 |

[W(NCH)<sub>8</sub>]<sup>4+</sup> E=-813.302 Hartree

symmetry: C<sub>1</sub> but very close to D<sub>4d</sub>

W-N 2.172-2.173 Å, N-C 1.146 Å, C-H 1.085 Å

W-N-C 179.9°, N-C-H 179.6°

N-W-N 73.3° (8x), 77.4-77.5° (8x), 115.2-115.3° (4x), 142.3° (8x)

Most intense IR frequencies: 407, 819-821, 861, 2200-2203, 3273 cm<sup>-1</sup>

|    |              |              |              |
|----|--------------|--------------|--------------|
| 74 | 0.000006000  | 0.000012000  | 0.000065000  |
| 7  | 1.771562000  | -0.477909000 | -1.163069000 |
| 7  | 0.477632000  | 1.771103000  | -1.163718000 |
| 7  | 1.590784000  | 0.914189000  | 1.163218000  |
| 7  | -0.913947000 | 1.590508000  | 1.163647000  |
| 7  | 0.913870000  | -1.590556000 | 1.163668000  |
| 7  | -1.590800000 | -0.914206000 | 1.163193000  |
| 7  | -0.477665000 | -1.771127000 | -1.163702000 |
| 7  | -1.771616000 | 0.477837000  | -1.163074000 |
| 6  | 2.707065000  | -0.729923000 | -1.775184000 |
| 6  | 0.729675000  | 2.706394000  | -1.776148000 |
| 6  | 2.430733000  | 1.397261000  | 1.775174000  |
| 6  | -1.396836000 | 2.430369000  | 1.775873000  |
| 6  | 1.396811000  | -2.430439000 | 1.775823000  |
| 6  | -2.430780000 | -1.397127000 | 1.775224000  |
| 6  | -0.729489000 | -2.706509000 | -1.776082000 |
| 6  | -2.707108000 | 0.729963000  | -1.775155000 |
| 1  | 0.967464000  | 3.587792000  | -2.362470000 |
| 1  | -0.966937000 | -3.588100000 | -2.362250000 |
| 1  | -3.222683000 | -1.852683000 | 2.360467000  |
| 1  | 3.222425000  | 1.852953000  | 2.360598000  |
| 1  | 1.852480000  | -3.222040000 | 2.361384000  |
| 1  | -3.588819000 | 0.967830000  | -2.360975000 |
| 1  | 3.588659000  | -0.967567000 | -2.361274000 |
| 1  | -1.852239000 | 3.222147000  | 2.361401000  |

[W(CNH)<sub>8</sub>]<sup>4+</sup> • 8 HF E=-1617.263 Hartree Symmetry: C<sub>1</sub>

W-C 2.197-2.198 Å, C-N 1.148 Å, N-H 1.049 Å, H...F 1.548-1.552 Å, H-F 0.930 Å

W-C-N 179.0-179.3°, C-N-H 177.3-177.9°, N-H...F 166.3-167.1°

C-W-C 72.4-73.0° (8x), 78.5-79.0° (8x), 113.2-113.7° (4x), 142.5-143.1° (8x)

Intense IR frequencies: 413-418, 431, 880, 946, 972, 985, 2193-2197, 2991-3006, 3957-3959 cm<sup>-1</sup>

|    |              |              |              |
|----|--------------|--------------|--------------|
| 74 | 0.003068000  | -0.046565000 | -0.004950000 |
| 9  | -3.544820000 | 3.702868000  | -2.867428000 |
| 9  | -3.790274000 | -3.260217000 | -3.184621000 |
| 9  | 5.025106000  | -0.342191000 | 3.085166000  |
| 9  | -0.423747000 | -5.265576000 | 2.725562000  |
| 9  | 3.278974000  | 3.845405000  | -2.997908000 |
| 9  | 0.383204000  | 4.800336000  | 3.340926000  |
| 9  | -4.951537000 | 0.424100000  | 3.161527000  |
| 9  | 3.968288000  | -3.046171000 | -3.180700000 |
| 7  | -0.094726000 | -2.901754000 | 1.736979000  |
| 7  | -2.863740000 | -0.049440000 | 1.718674000  |
| 7  | -1.928966000 | -1.965922000 | -1.947303000 |
| 7  | -1.899360000 | 1.990198000  | -1.854805000 |
| 7  | 2.076381000  | -1.971551000 | -1.789553000 |
| 7  | 2.057004000  | 1.976763000  | -1.701397000 |
| 7  | 2.721688000  | -0.100712000 | 1.941581000  |
| 7  | -0.048430000 | 2.725089000  | 1.868690000  |
| 6  | -0.056157000 | -1.918381000 | 1.146456000  |
| 6  | -1.877969000 | -0.058956000 | 1.130777000  |
| 6  | -1.256158000 | -1.310315000 | -1.287853000 |
| 6  | -1.243225000 | 1.286366000  | -1.229234000 |
| 6  | 1.355298000  | -1.317487000 | -1.181574000 |
| 6  | 1.356382000  | 1.274938000  | -1.123638000 |
| 6  | 1.783055000  | -0.080367000 | 1.281265000  |
| 6  | -0.038125000 | 1.772096000  | 1.229322000  |
| 1  | -3.751225000 | 0.002044000  | 2.275665000  |
| 1  | 3.597826000  | -0.135228000 | 2.517148000  |
| 1  | 2.663850000  | 2.644396000  | -2.236808000 |
| 1  | -2.576817000 | -2.548083000 | -2.531206000 |
| 1  | 2.760537000  | -2.530055000 | -2.354874000 |
| 1  | -0.017841000 | 3.588773000  | 2.463945000  |
| 1  | -0.152710000 | -3.814139000 | 2.250567000  |
| 1  | -2.515219000 | 2.647225000  | -2.393005000 |
| 1  | -3.847369000 | 4.084576000  | -3.660149000 |
| 1  | -3.973380000 | -3.859508000 | -3.872353000 |
| 1  | 5.505978000  | -0.173716000 | 3.863570000  |
| 1  | -0.263720000 | -5.811632000 | 3.461712000  |
| 1  | 4.067116000  | 4.071402000  | -3.437600000 |
| 1  | -0.022064000 | 5.507787000  | 3.789241000  |
| 1  | -5.740514000 | 0.059758000  | 3.493855000  |
| 1  | 4.254231000  | -3.820874000 | -3.609362000 |

[W(NCH)<sub>8</sub>]<sup>4+</sup> • 8 HF E=-1617.275 Hartree Symmetry: C<sub>1</sub>

W-N 2.161-2.163 Å, N-C 1.147 Å, C-H 1.107 Å, H...F 1.666-1.668 Å H-F 0.929 Å

W-N-C 178.4-178.6°, N-C-H 179.0-179.2°, C-H-F 164.1-164.5°

N-W-N 73.4-73.5° (8x), 77.1-77.3° (8x), 115.4-115.6° (4x), 142.1-142.3° (8x)

Most intense IR frequencies: 425, 962, 2145-2152, 2960-2971, 3974-3976 cm<sup>-1</sup>

|    |              |              |              |
|----|--------------|--------------|--------------|
| 74 | -0.012943000 | -0.007309000 | -0.008259000 |
| 9  | 1.278129000  | -5.180299000 | -2.821020000 |
| 9  | -4.459246000 | 2.957920000  | 2.780896000  |
| 9  | 3.223300000  | 4.142082000  | 2.929519000  |
| 9  | 5.192987000  | 1.358920000  | -2.721947000 |
| 9  | -3.073593000 | -4.449957000 | 2.682192000  |
| 9  | 4.462057000  | -3.061696000 | 2.635413000  |
| 9  | -5.317272000 | -0.952429000 | -2.711129000 |
| 9  | -1.069338000 | 5.319630000  | -2.625649000 |
| 7  | 0.975585000  | 1.514964000  | 1.166026000  |
| 7  | 1.536041000  | -1.008388000 | 1.120065000  |
| 7  | 1.767726000  | 0.407436000  | -1.161487000 |
| 7  | 0.376511000  | -1.772776000 | -1.192856000 |
| 7  | -0.412721000 | 1.797011000  | -1.129752000 |
| 7  | -1.805279000 | -0.382507000 | -1.157006000 |
| 7  | -1.549580000 | 0.955534000  | 1.168341000  |
| 7  | -0.988494000 | -1.569095000 | 1.124303000  |
| 6  | 1.518806000  | 2.325334000  | 1.769088000  |
| 6  | 2.369468000  | -1.549200000 | 1.693137000  |
| 6  | 2.726830000  | 0.636406000  | -1.747309000 |
| 6  | 0.592580000  | -2.723542000 | -1.796884000 |
| 6  | -0.624787000 | 2.769837000  | -1.699065000 |
| 6  | -2.772645000 | -0.579426000 | -1.740863000 |
| 6  | -2.376425000 | 1.477315000  | 1.767959000  |
| 6  | -1.519353000 | -2.406152000 | 1.701359000  |
| 1  | 1.350849000  | -5.778504000 | -3.528376000 |
| 1  | -5.014360000 | 3.216146000  | 3.479934000  |
| 1  | 3.413990000  | 4.797036000  | 3.560487000  |
| 1  | 5.805484000  | 1.440702000  | -3.415941000 |
| 1  | -3.315416000 | -5.040382000 | 3.357778000  |
| 1  | 5.025531000  | -3.338360000 | 3.320565000  |
| 1  | -5.909623000 | -1.145655000 | -3.400527000 |
| 1  | -1.259328000 | 5.918004000  | -3.310733000 |
| 1  | -0.826255000 | 3.716767000  | -2.235113000 |
| 1  | -2.043233000 | -3.214180000 | 2.246764000  |
| 1  | 2.060172000  | 3.099758000  | 2.345237000  |
| 1  | 0.808358000  | -3.647107000 | -2.367258000 |
| 1  | -3.714553000 | -0.764443000 | -2.291453000 |
| 1  | 3.658218000  | 0.864847000  | -2.299759000 |
| 1  | 3.176814000  | -2.079794000 | 2.233157000  |
| 1  | -3.177458000 | 1.989801000  | 2.333980000  |



## 7. References

- [1] J. G. Leipoldt, L. D. C. Bok, P. J. Cilliers, *Z. Anorg. Allg. Chem.* **1974**, *409*, 343-344.
- [2] J. G. Leipoldt, L. D. C. Bok, P. J. Cilliers, *Z. Anorg. Allg. Chem.* **1974**, *407*, 350-352.
- [3] G. Sheldrick, *Acta Crystallograph.* **2008**, *A64*, 112-122.
- [4] Bruker, APEX2, SAINT, SADABS2014/15., *Bruker AXS Inc. Madison, Wisconsin, USA.*
- [5] O. V. Dolomanov, L. J. Bourhis, R. J. Gildea, J. A. K. Howard, H. Puschmann, *J. Appl. Cryst.* **2009**, *42*, 339-341.
- [6] C. F. Macrae, P. R. Edgington, P. McCabe, E. Pidcock, G. P. Shields, R. Taylor, M. Towler, J. van de Streek, *J. Appl. Cryst.* **2006**, *39*, 453-457.
- [7] S. P. Westrip, *J. Appl. Cryst.* **2010**, *43*, 920-925.
- [8] M. Llunell, D. Casanova, J. Cirera, J. M. Bofill, P. Alemany, S. Alvarez, SHAPE v. 2.1, **2013**.
- [9] M. J. Frisch, G. W. Trucks, H. B. Schlegel, G. E. Scuseria, M. A. Robb, J. R. Cheeseman, G. Scalmani, V. Barone, G. A. Petersson, H. Nakatsuji, X. Li, M. Caricato, A. V. Marenich, J. Bloino, B. G. Janesko, R. Gomperts, B. Mennucci, H. P. Hratchian, J. V. Ortiz, A. F. Izmaylov, J. L. Sonnenberg, D. Williams-Young, F. Ding, F. Lipparini, F. Egidi, J. Goings, B. Peng, A. Petrone, T. Henderson, D. Ranasinghe, V. G. Zakrzewski, J. Gao, N. Rega, G. Zheng, W. Liang, M. Hada, M. Ehara, K. Toyota, R. Fukuda, J. Hasegawa, M. Ishida, T. Nakajima, Y. Honda, O. Kitao, H. Nakai, T. Vreven, K. Throssell, J. A. Montgomery, J. E. P. Jr., F. Ogliaro, M. J. Bearpark, J. J. Heyd, E. N. Brothers, K. N. Kudin, V. N. Staroverov, T. A. Keith, R. Kobayashi, J. Normand, K. Raghavachari, A. P. Rendell, J. C. Burant, S. S. Iyengar, J. Tomasi, M. Cossi, J. M. Millam, M. Klene, C. Adamo, R. Cammi, J. W. Ochterski, R. L. Martin, K. Morokuma, O. Farkas, J. B. Foresman, D. J. Fox, Gaussian, Inc., , Wallingford CT, **2016**.
- [10] M. K. Kesharwani, B. Brauer, J. M. L. Martin, *J. Phys. Chem. A.* **2015**, *119*, 1701-1714.
